# Supplementary material
Source: publisher figshare collection journal article supplement (https://tandf.figshare.com/ndownloader/files/14037887)

Supporting Information for

**Structure-guided design of anti-pancreatic cancer ribonucleotide reductase inhibitors**

**Tessianna A. Misko, Yi-Ting Liu, Michael E. Harris, Nancy L. Oleinick, John Pink,**

**Hsueh-Yun Lee*****, Chris G. Dealwis***

**Contents**

Figure 1: Predicted binding interactions of TP compounds at the C-site of hRRM1………………………………… 3

Figure 2: Other interaction plots……………………………………………………………………………………………………………..5

Figure 3: Cancer growth-inhibitory activity of A549 lung cancer cell line and HCT116 colon cancer cell line…………………………………………………………………………………………………………………………………………………………..8

Table 1: Compound specific wavelength and extinction coefficient for concentration determination……..9

1H NMR Spectra …………………………………………………………………………………………………………………………………….10

13C NMR Spectra ……………………………………………………………………………………………………………………………………23

HRMS Spectra..……………………………………………………………………………………………………………………………………..36


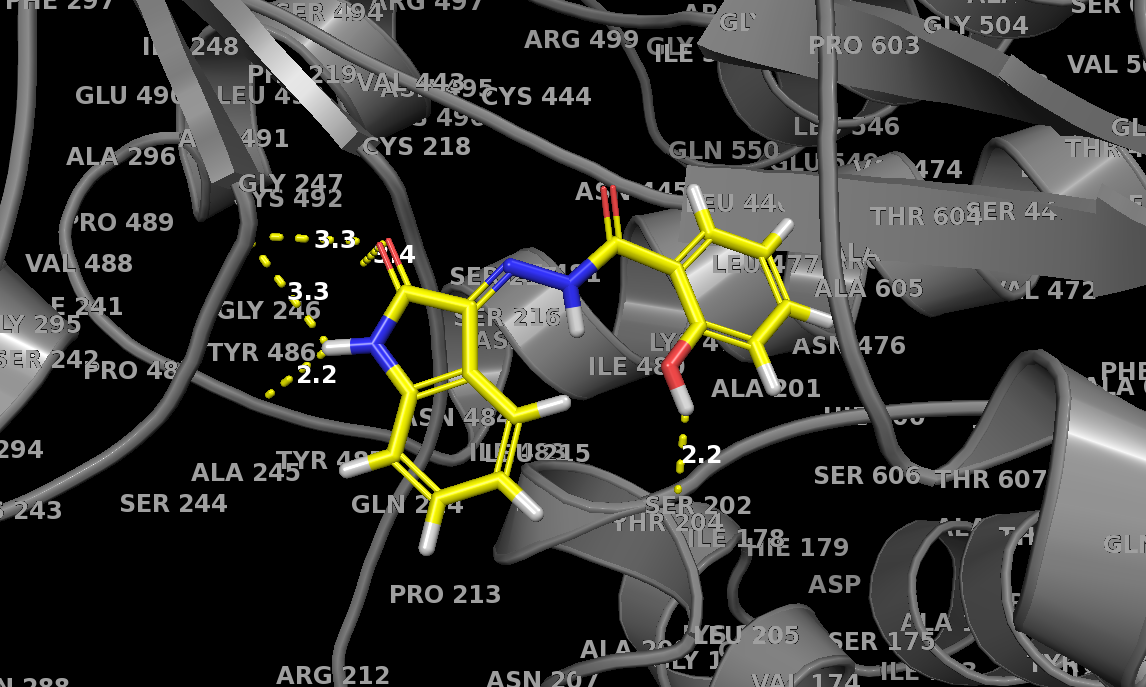

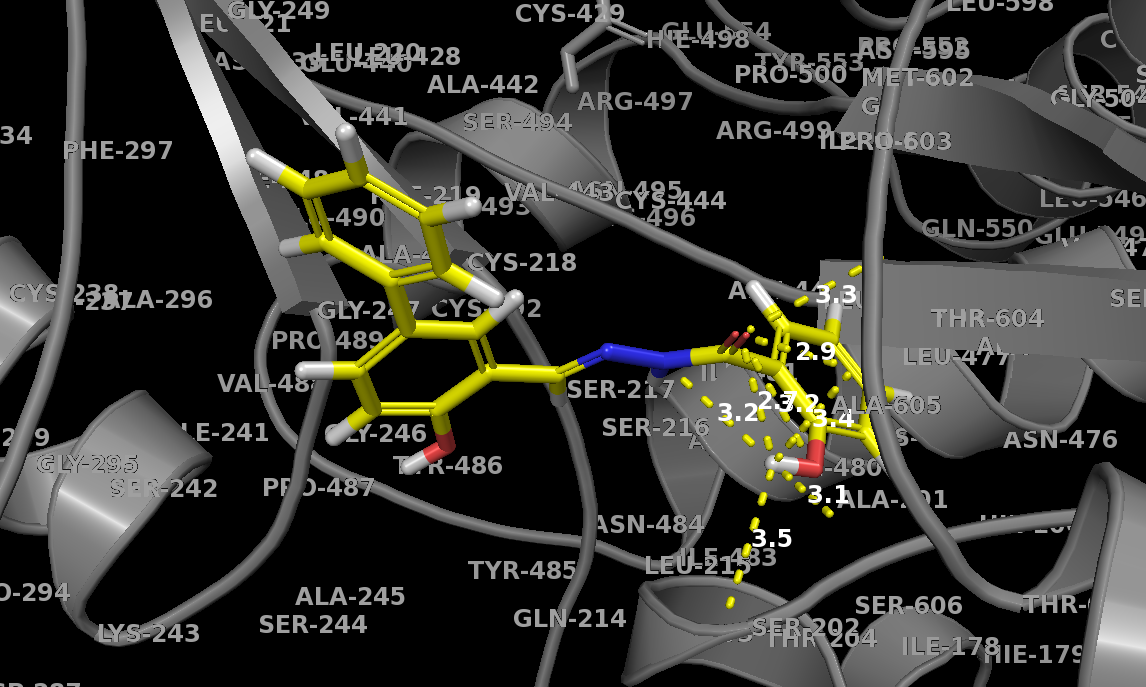


**A.**

**B.**

**D.**


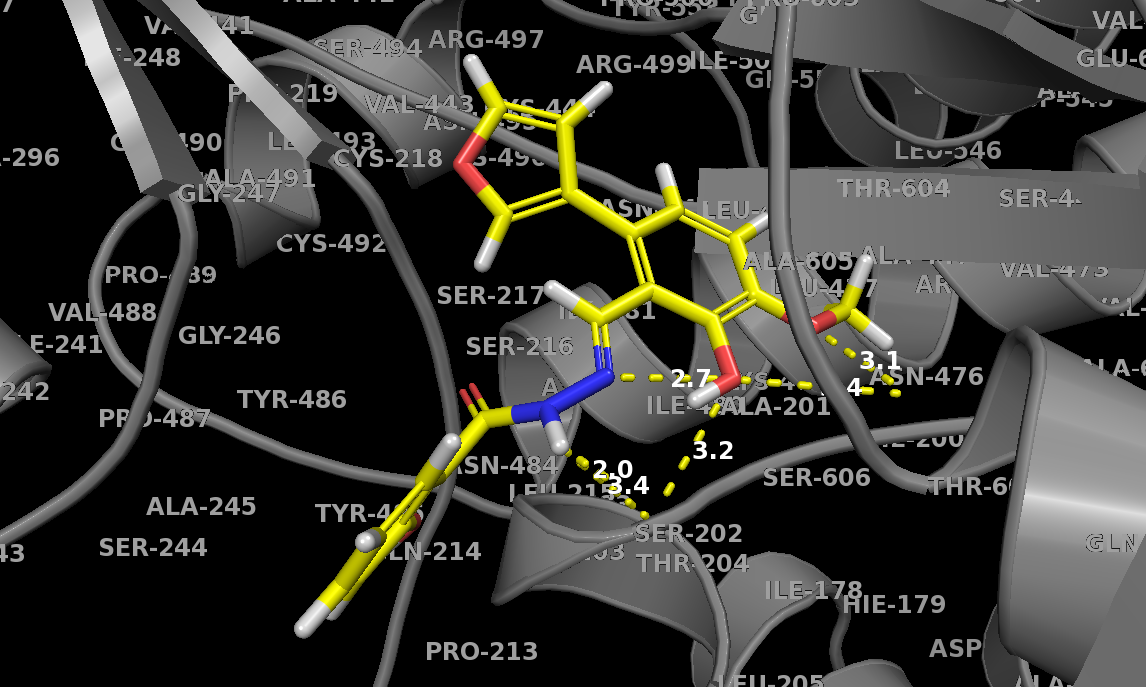

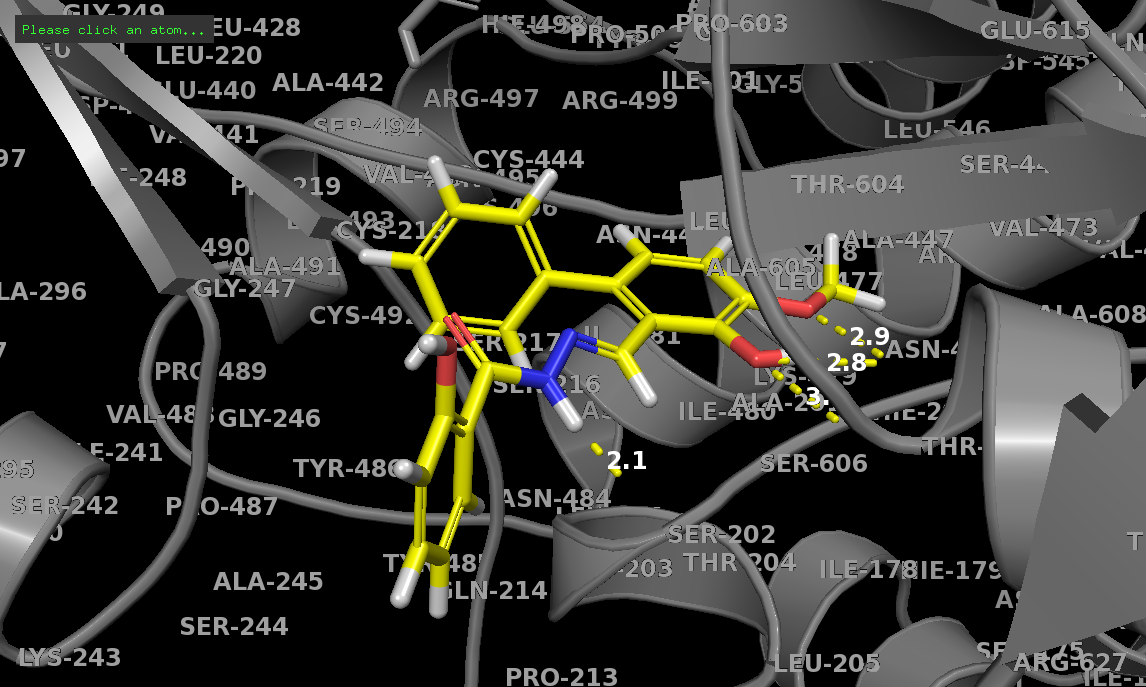


**C.**

**F.**


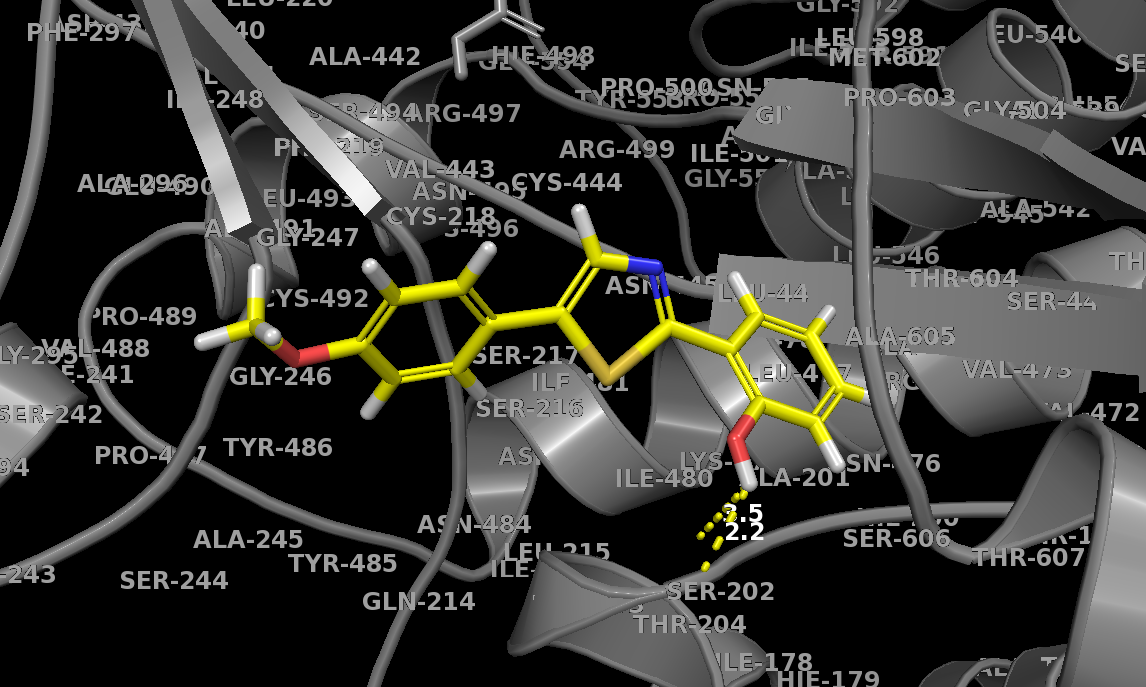

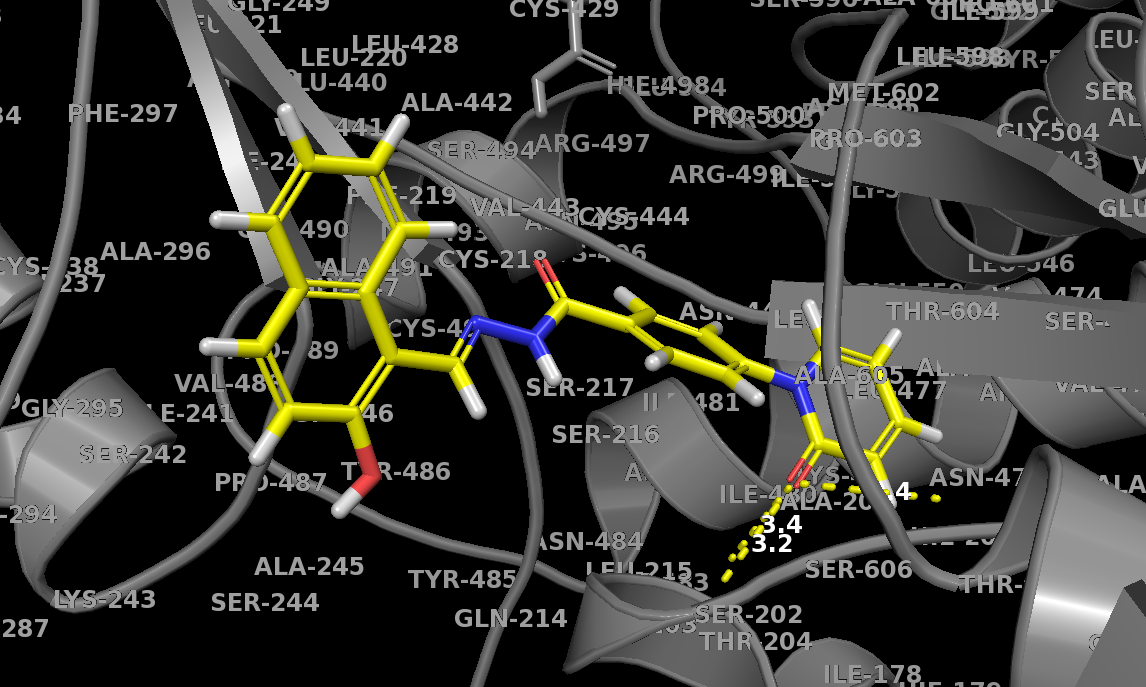


**E.**


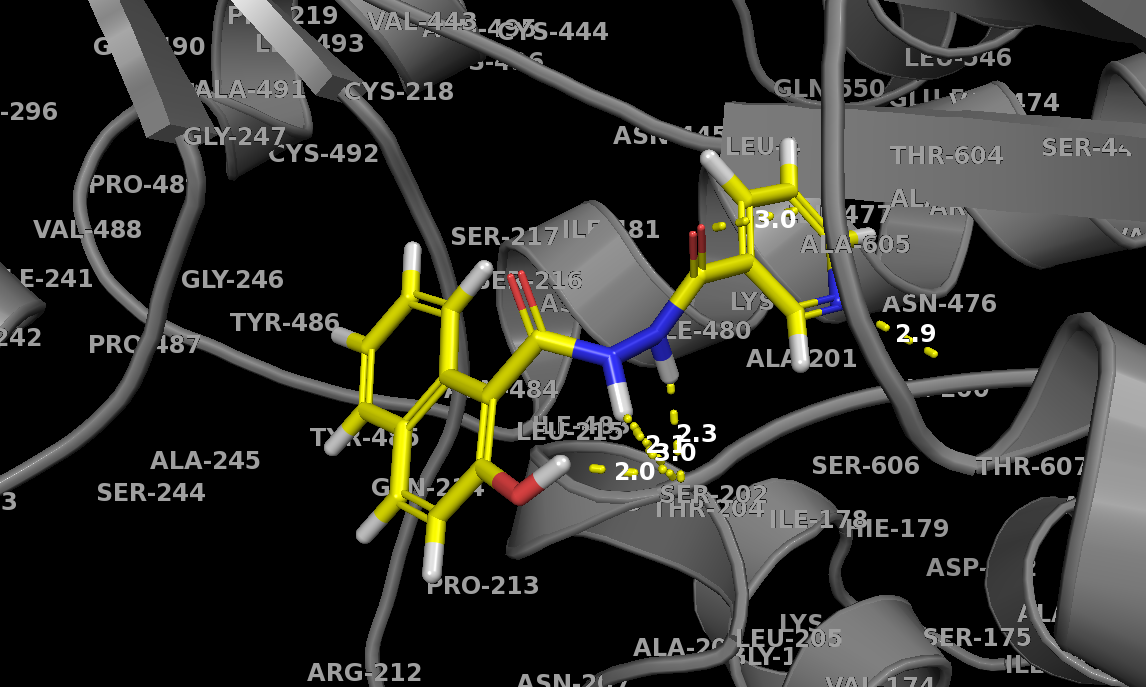

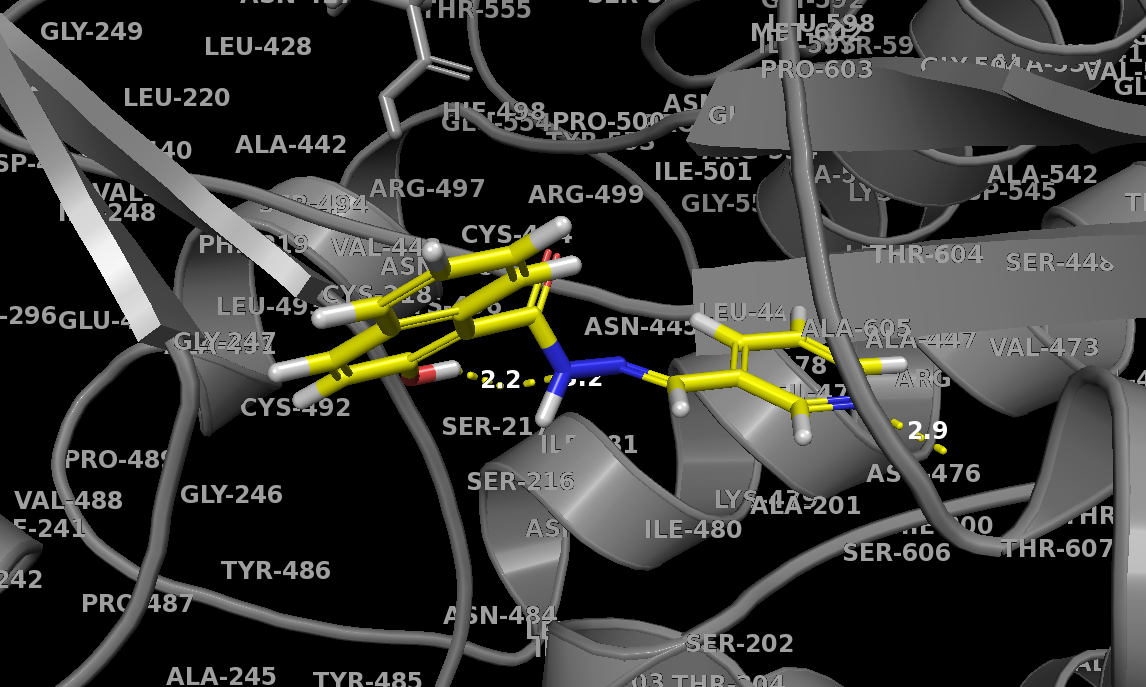


**I.**

**G.**

**H.**


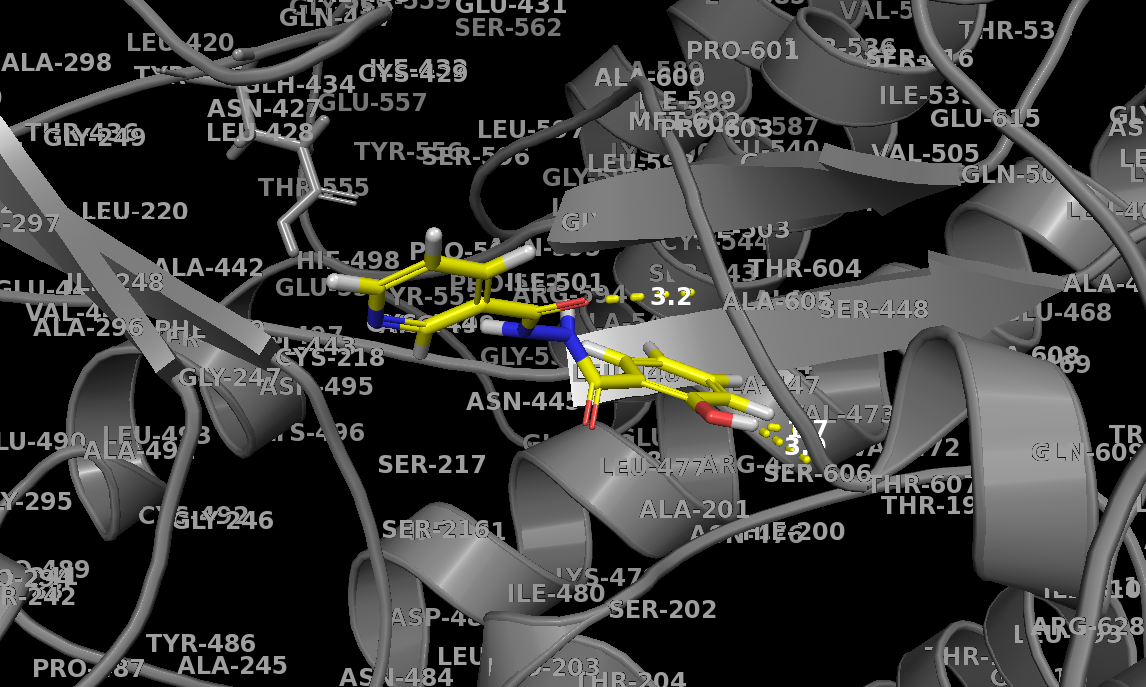


**Supplemental Figure 1**. Predicted binding interactions of TP compounds at the C-site of hRRM1 based on the X-ray structure PDB ID 5TUS. Gray indicates RR protein residues. Yellow dotted lines indicate favorable hydrogen bond interactions. Yellow structures are TP compounds. (A) **TP1** shows predicted binding to the phosphate binding residues (S202) and close to loop 2 (A245 and G247). (B) **TP2** shows predicted binding to the phosphate binding residues (A605 and T607). (C) **TP4** shows predicted binding to the phosphate binding residues (S202, S606 and T607). (D) **TP5** shows predicted binding to the phosphate binding residues (S606 and T607). (E) **TP9** shows predicted binding to the phosphate binding residues (S202). (F) **TP10** shows predicted binding to the phosphate binding residues (S202 and S606). (G) **TP11** shows predicted binding to the phosphate binding residues (S202, S606 and T607). (H) **TP12** shows predicted binding to the phosphate binding residues (T607) and S217. (I) **TP13** shows predicted binding to the phosphate binding residues (A605 and T607).


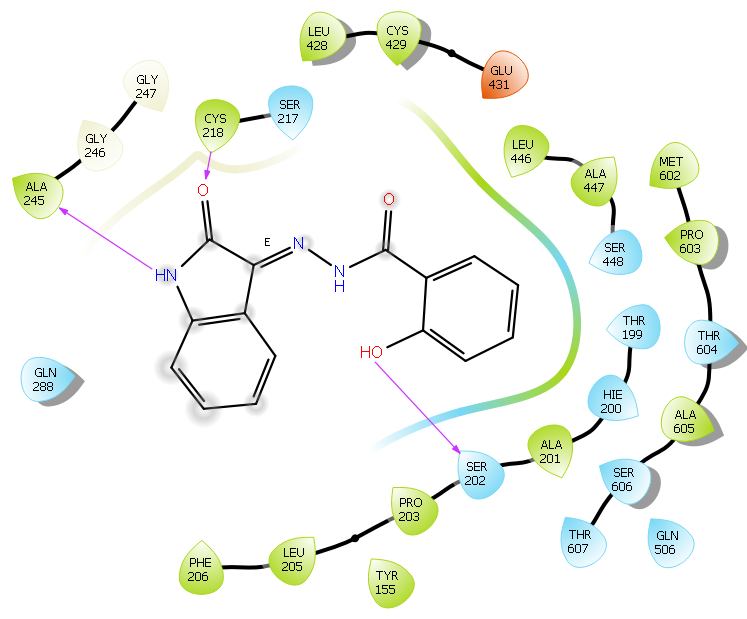

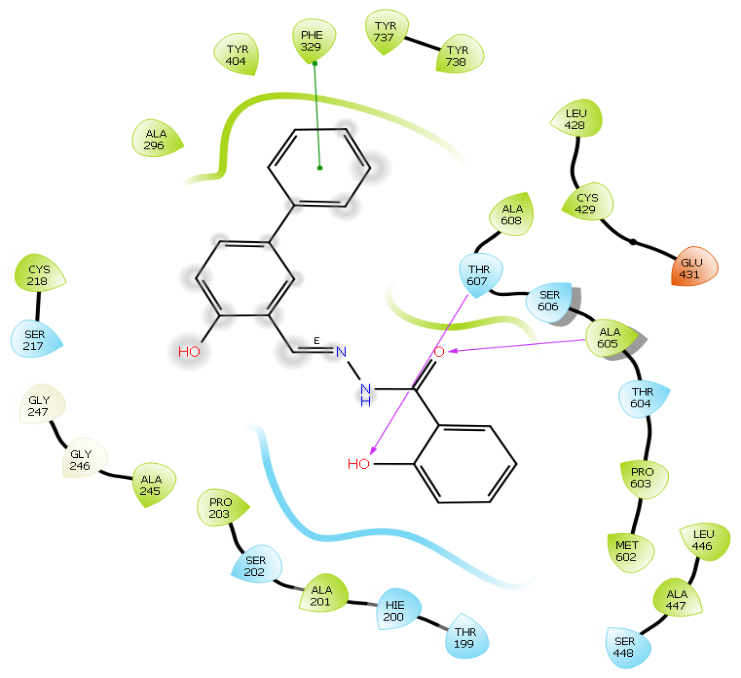


A

B


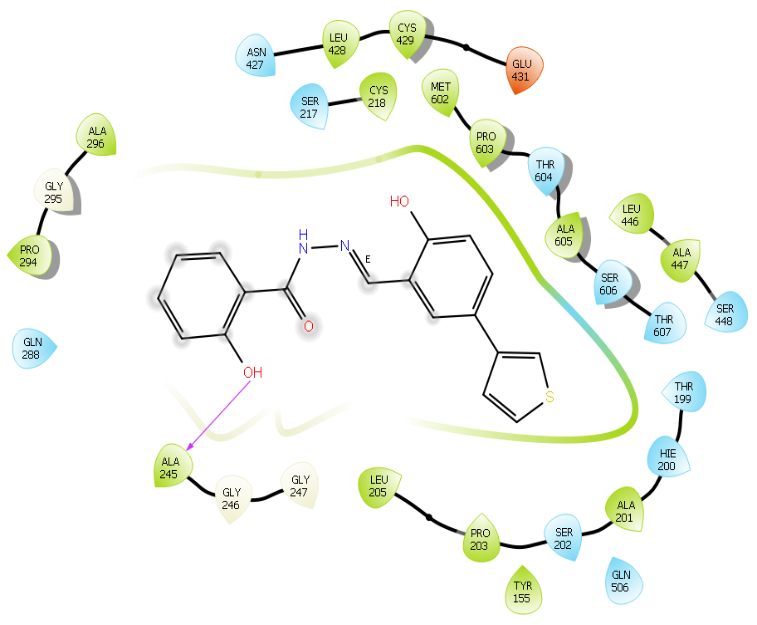

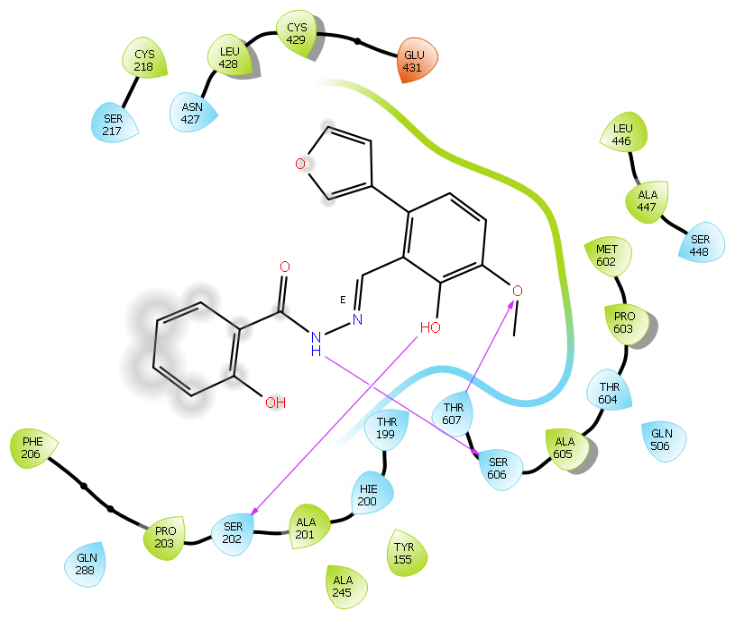


C

D


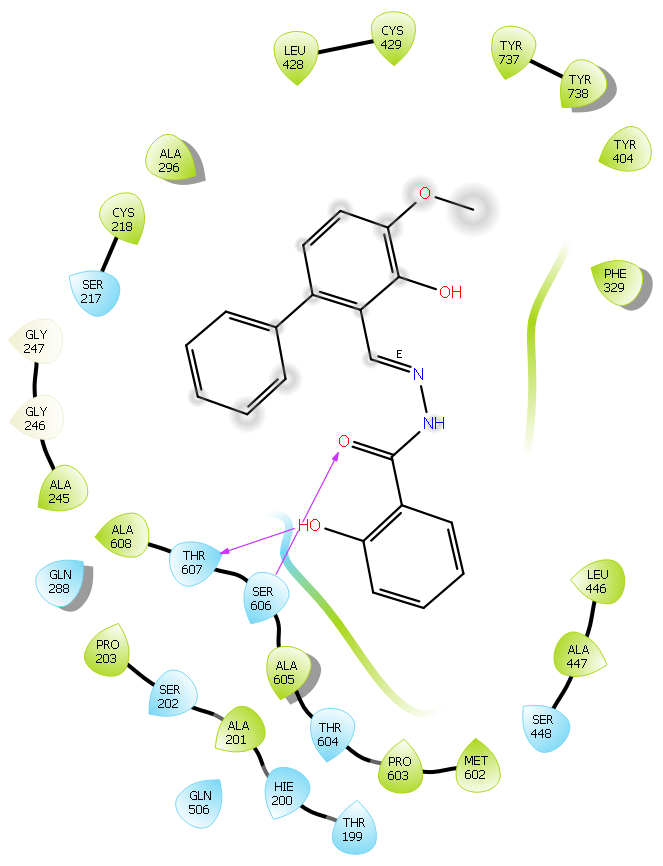

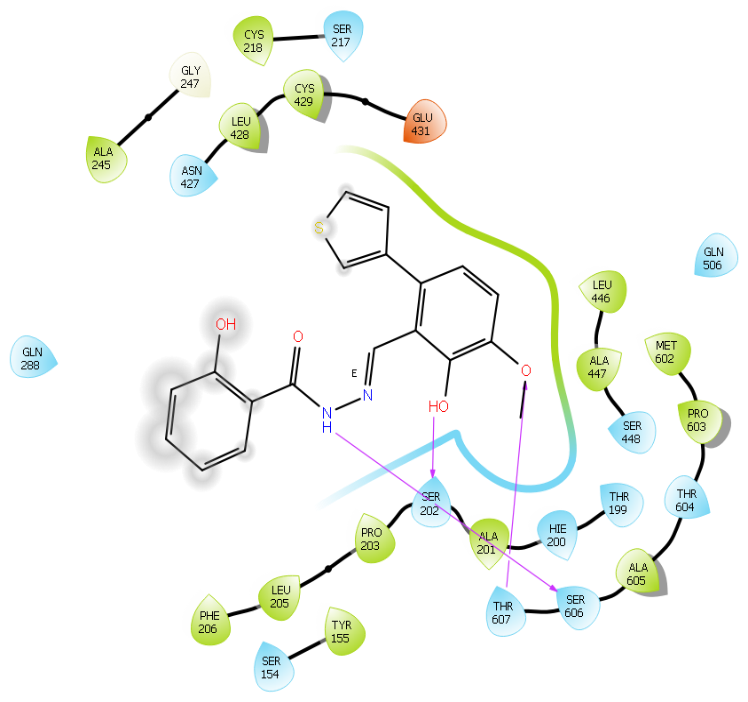


F

E


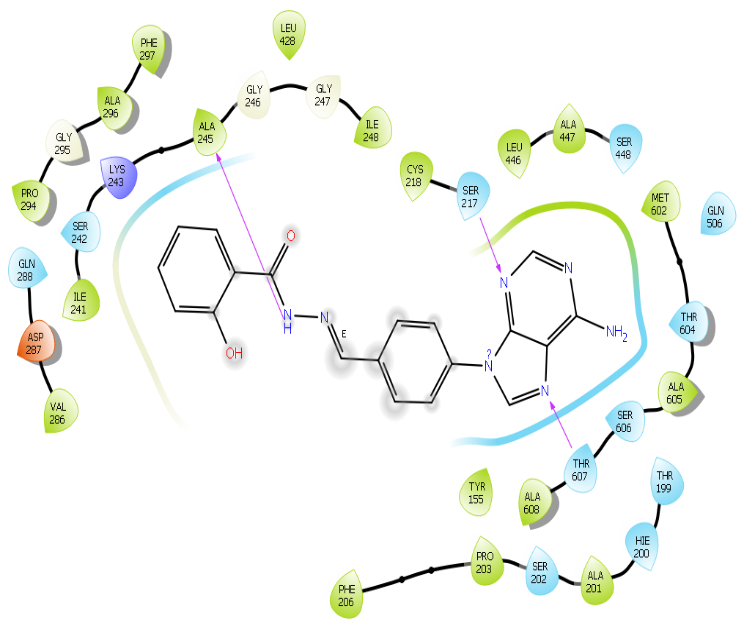

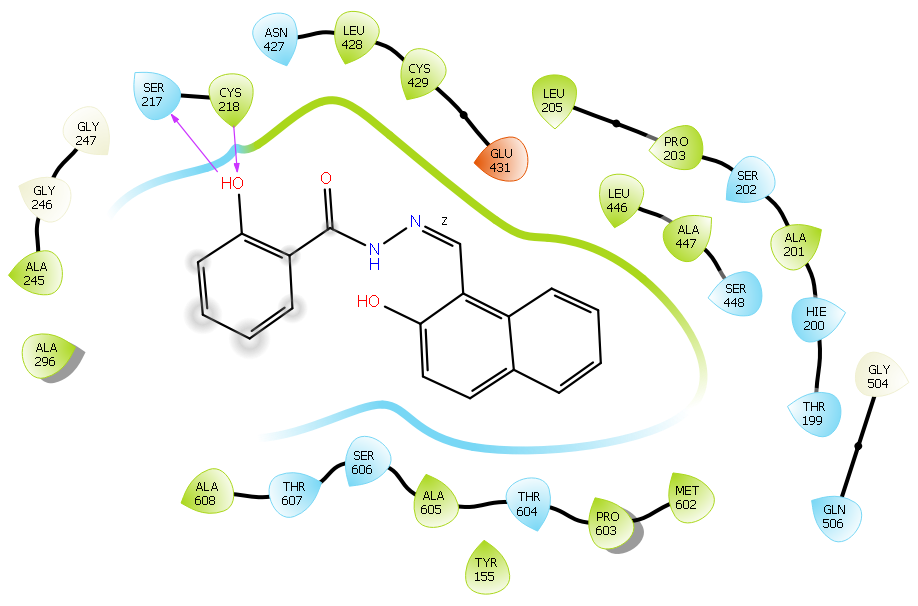


G

H


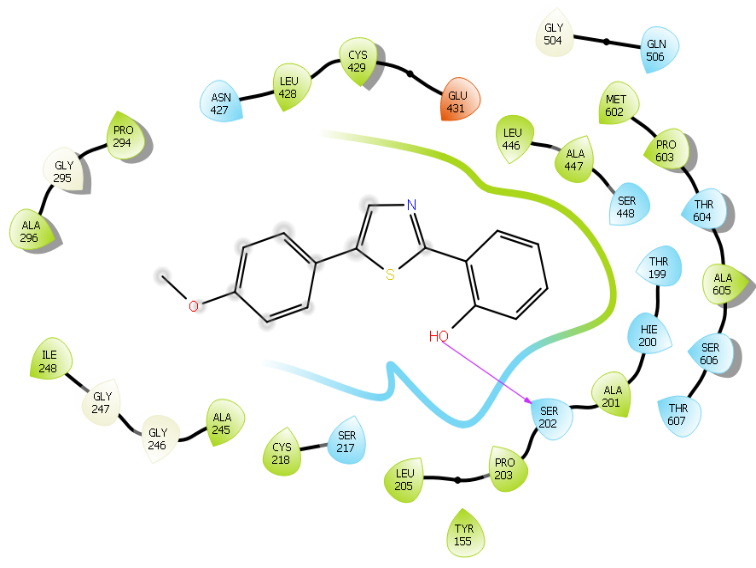

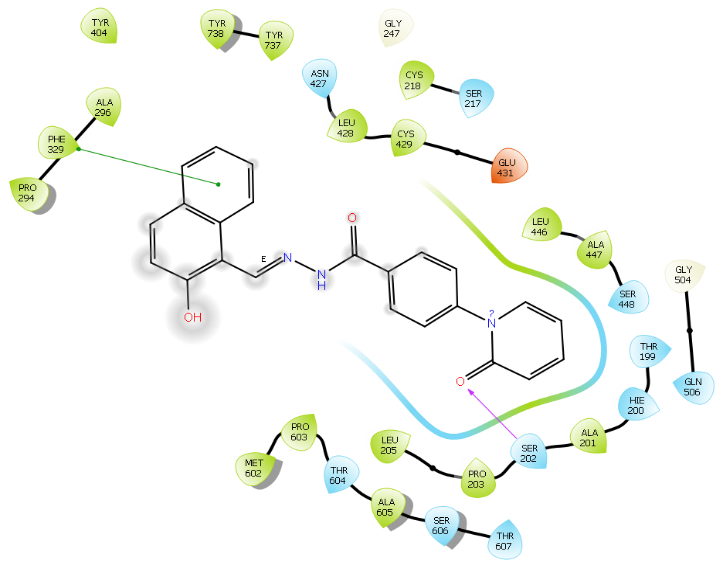


I

J


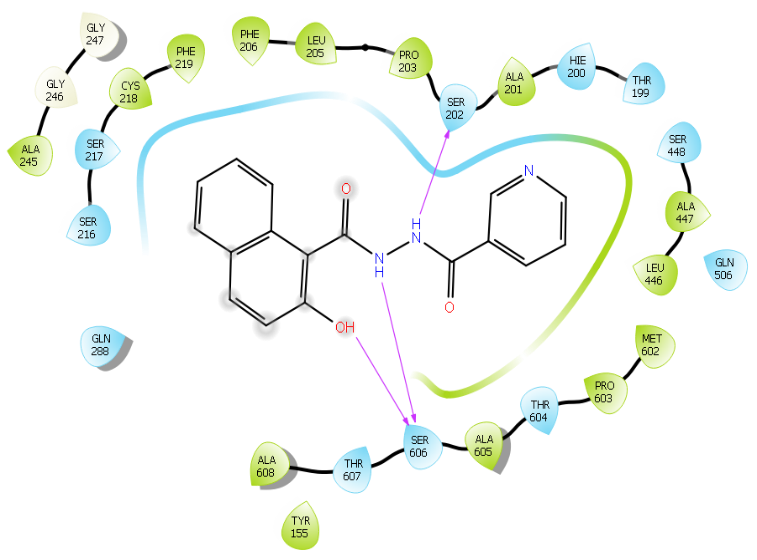

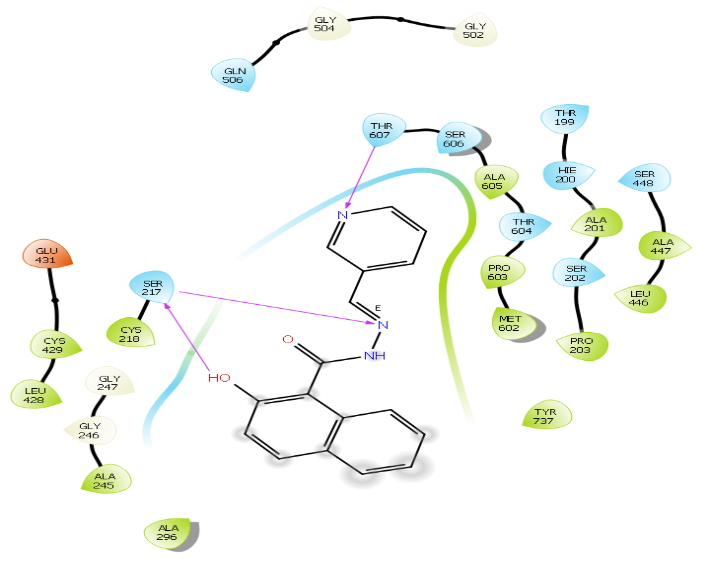


L

K


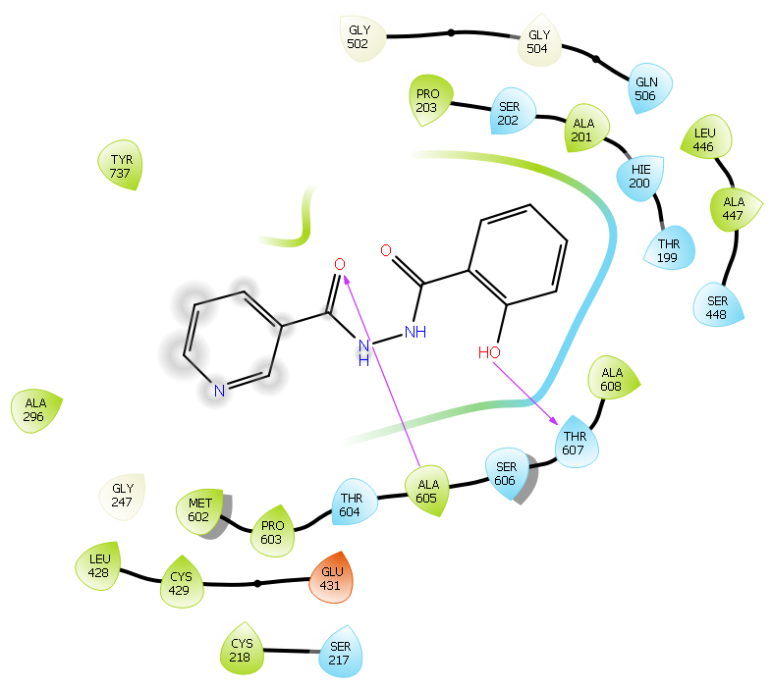


M

**Supplemental Figure 2**. Other interaction plots. Predicted binding interactions of TP compounds at the C-site of hRRM1 based on the X-ray structure PDB ID 5TUS. Green residues are hydrophobic, cyan residues are polar, white residues are glycine, red residues are negatively charged and blue residues are positively charged. Purple arrows indicate hydrogen bonds. Green lines indicate Pi-Pi stacking. (A) **TP1** (B) **TP2** (C) **TP3** (D) **TP4** (E) **TP5** (F) **TP6** (G) **TP7** (H) **TP8** (I) **TP9** (J) **TP10** (K) **TP11** (L) **TP12** (M) **TP13**


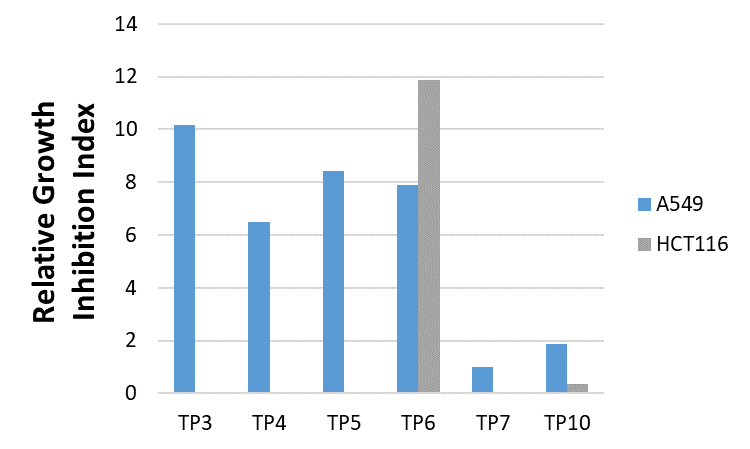


**Supplemental Figure 3**. Cancer growth-inhibitory activity of A549 lung cancer cell line and HCT116 colon cancer cell line by select TP compounds. Cells were treated with candidate compounds for 3 days in a standard growth inhibition assay in 96 well plates. Growth inhibition was assessed by measuring relative DNA content per well compared with that of untreated cells. Only **TP6** and **TP10** were assessed in HCT116 cell line.

**Supplemental Table 1**: Compound specific wavelength and extinction coefficient for concentration determination

| Compound | Wavelength peak (nm) | Extinction coefficient (M-1cm-1) |
| --- | --- | --- |
| TP1 | 333 | 19.15 |
| TP2 | 268 | 29.49 |
| TP3 | 279 | 28.83 |
| TP4 | 324 | 20.77 |
| TP5 | 324 | 19.98 |
| TP6 | 326 | 25.05 |
| TP7 | 322 | 24.36 |
| TP8 | 326 | 25.46 |
| TP9 | 264 | 21.83 |
| TP10 | 326 | 19.92 |
| TP11 | 288 | 5.44 |
| TP12 | 292 | 19.94 |
| TP13 | 305 | 5.09 |

**1H Spectra for compound TP1**


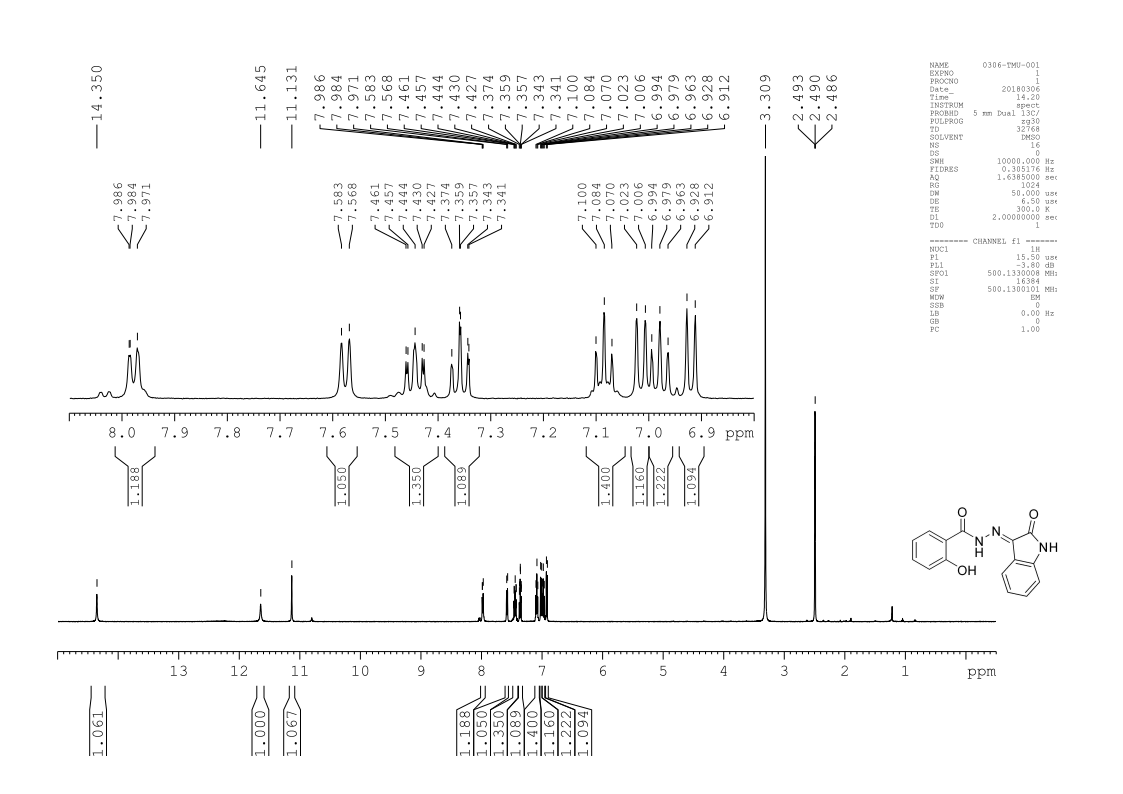


**1H Spectra for compound TP2**


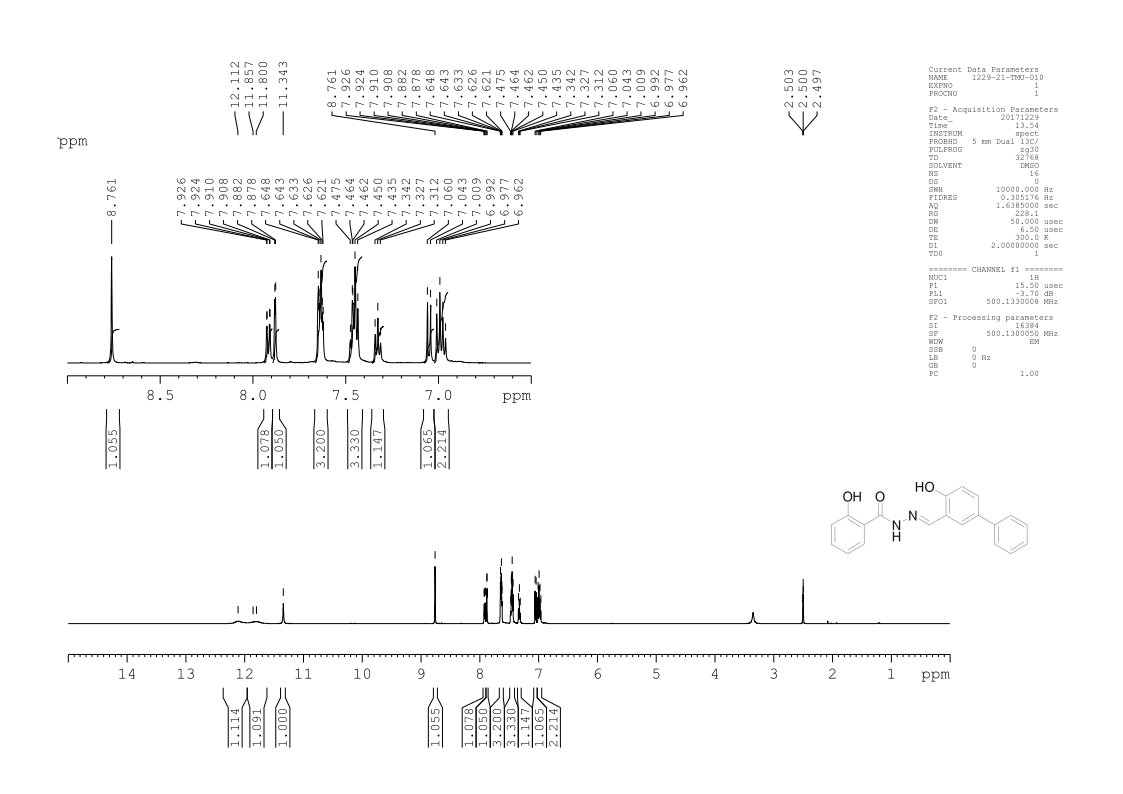


**1H Spectra for compound TP3**


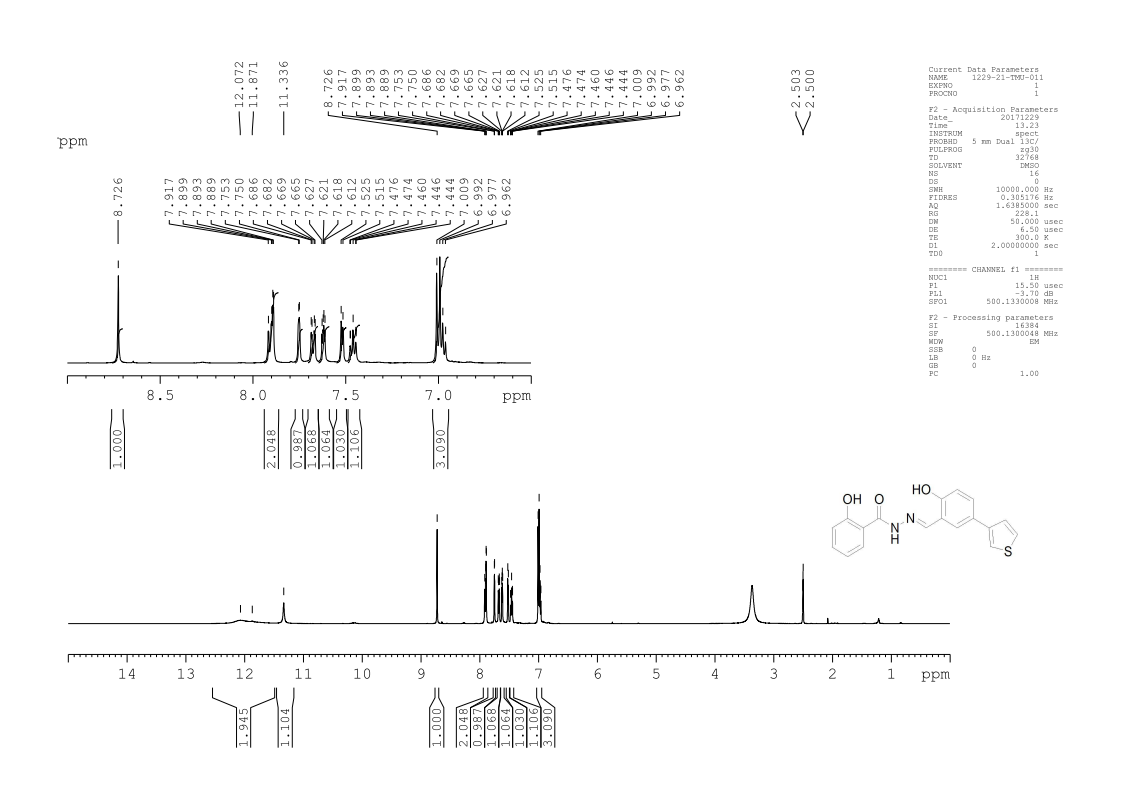


**1H Spectra for compound TP4**


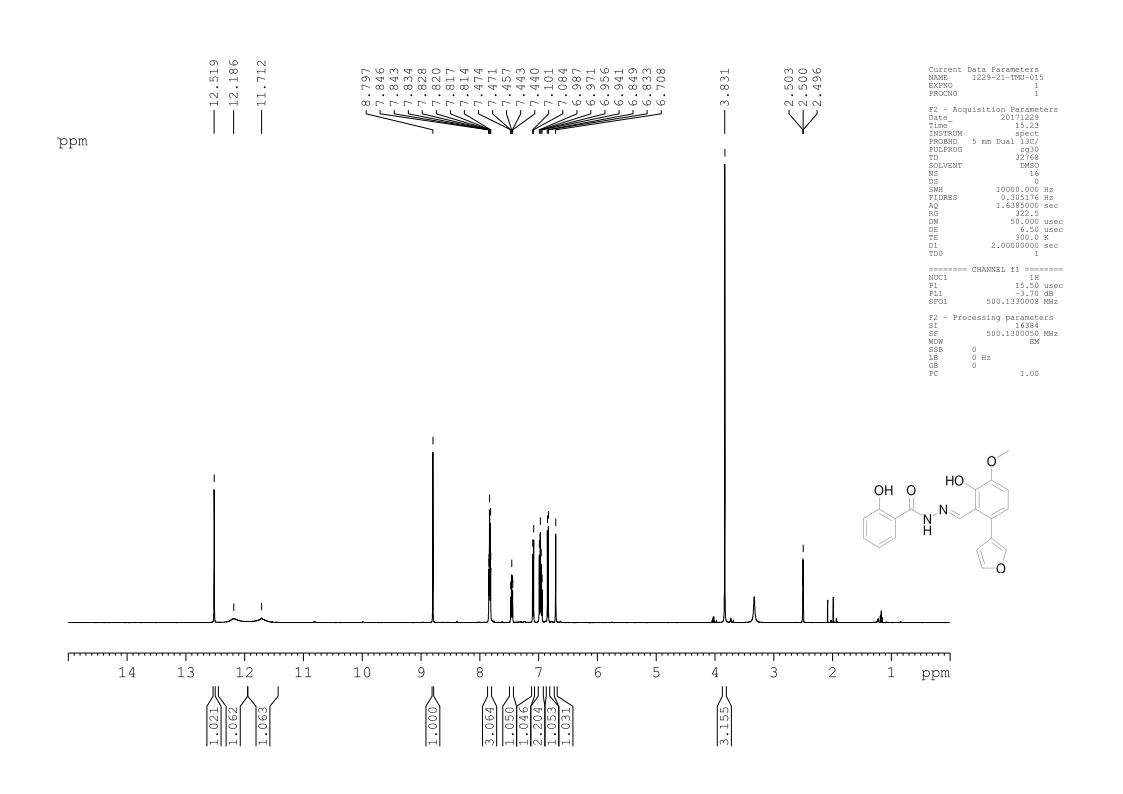


**1H Spectra for compound TP5**


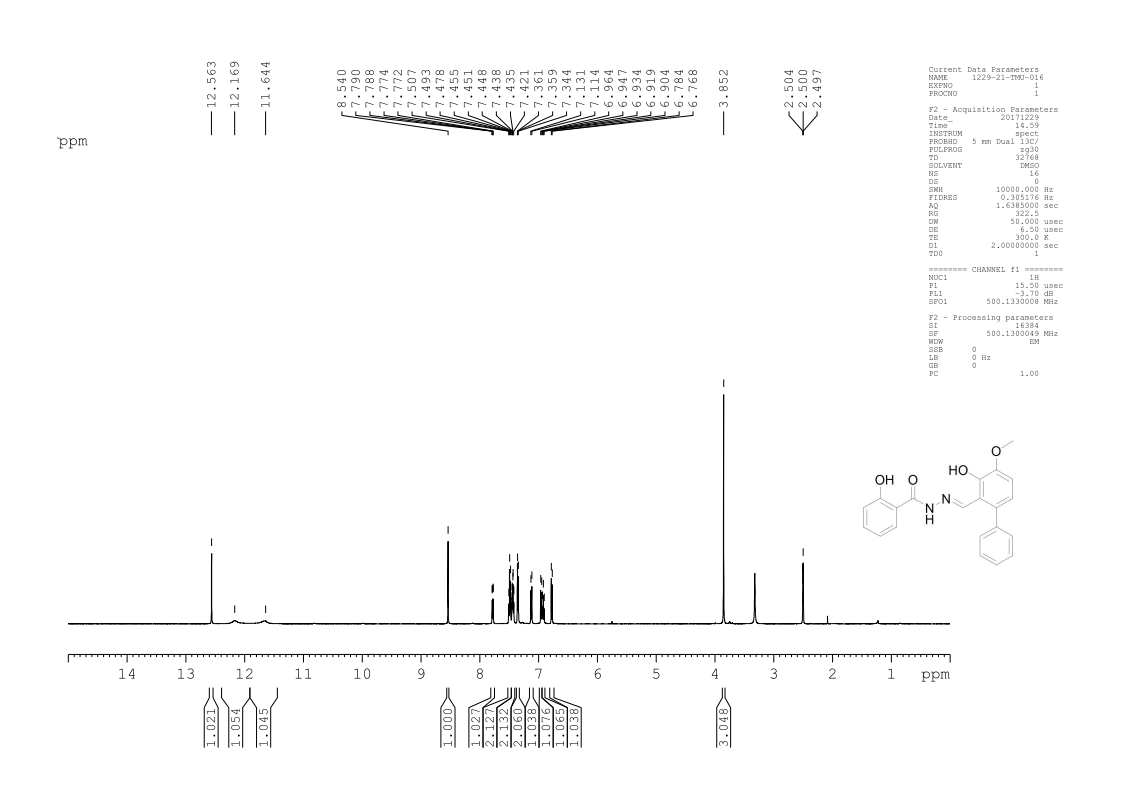


**1H Spectra for compound TP6**


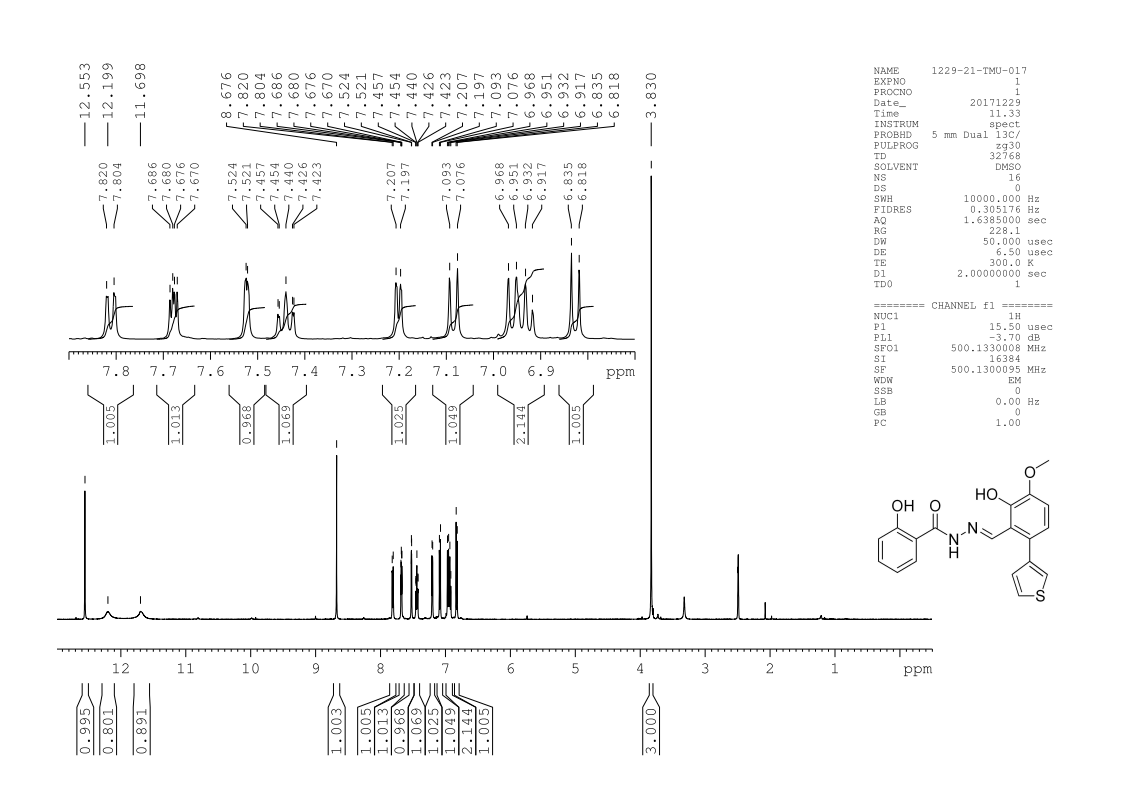


**1H Spectra for compound TP7**


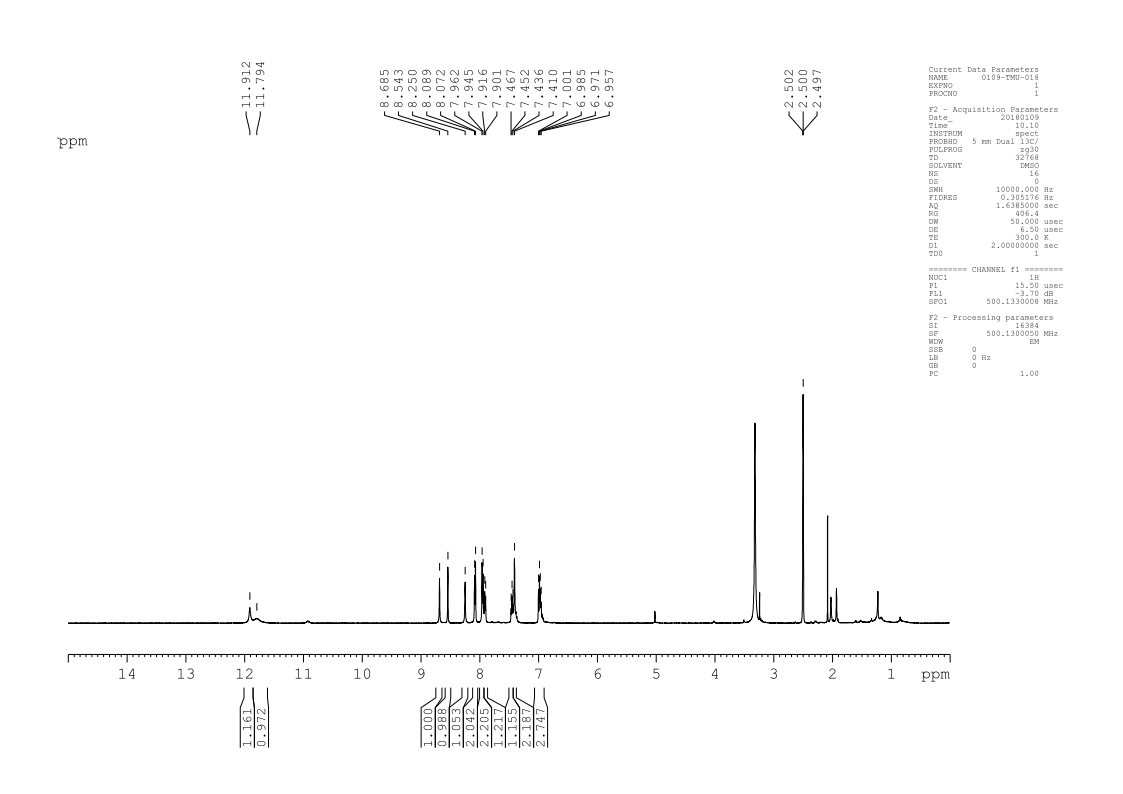


**1H Spectra for compound TP8**


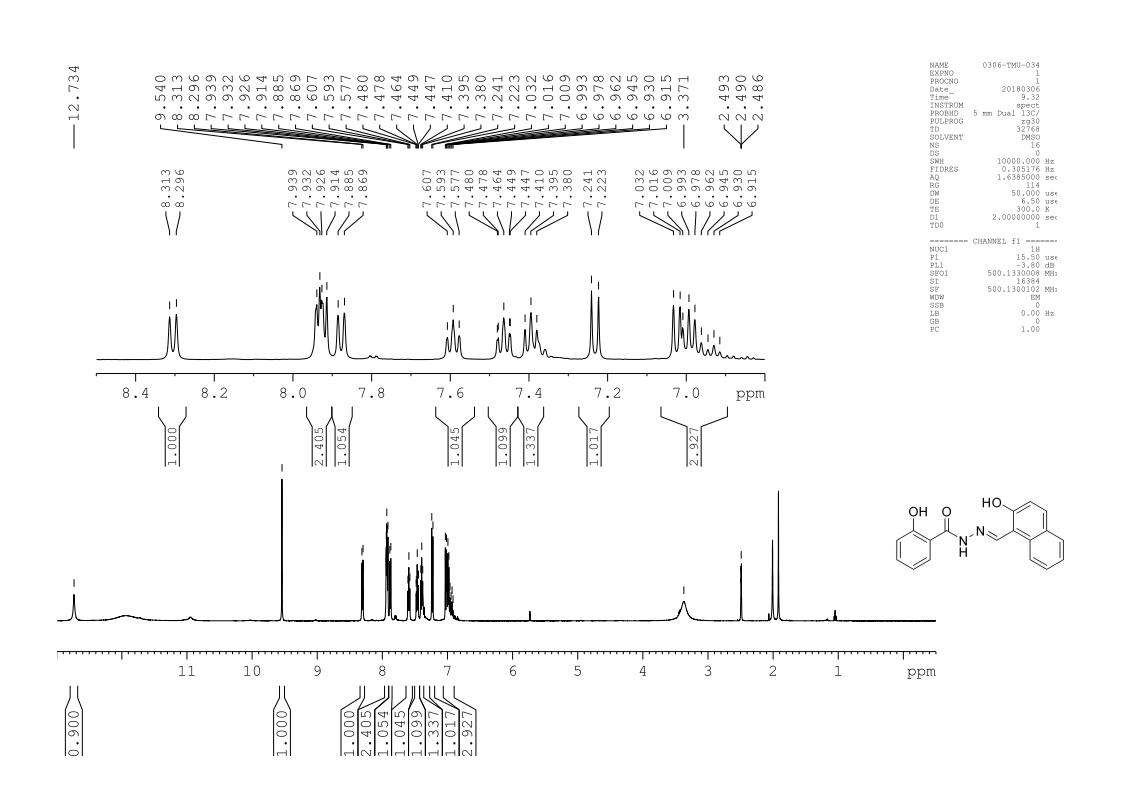


**1H Spectra for compound TP9**


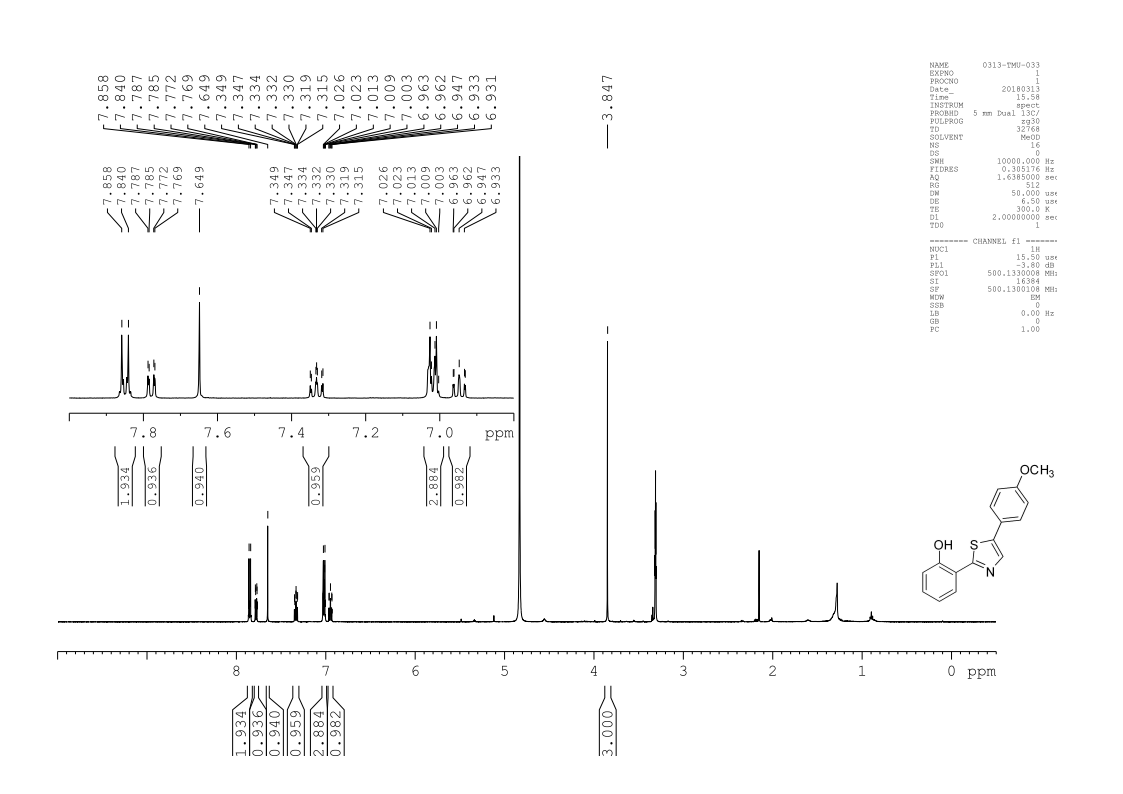


**1H Spectra for compound TP10**


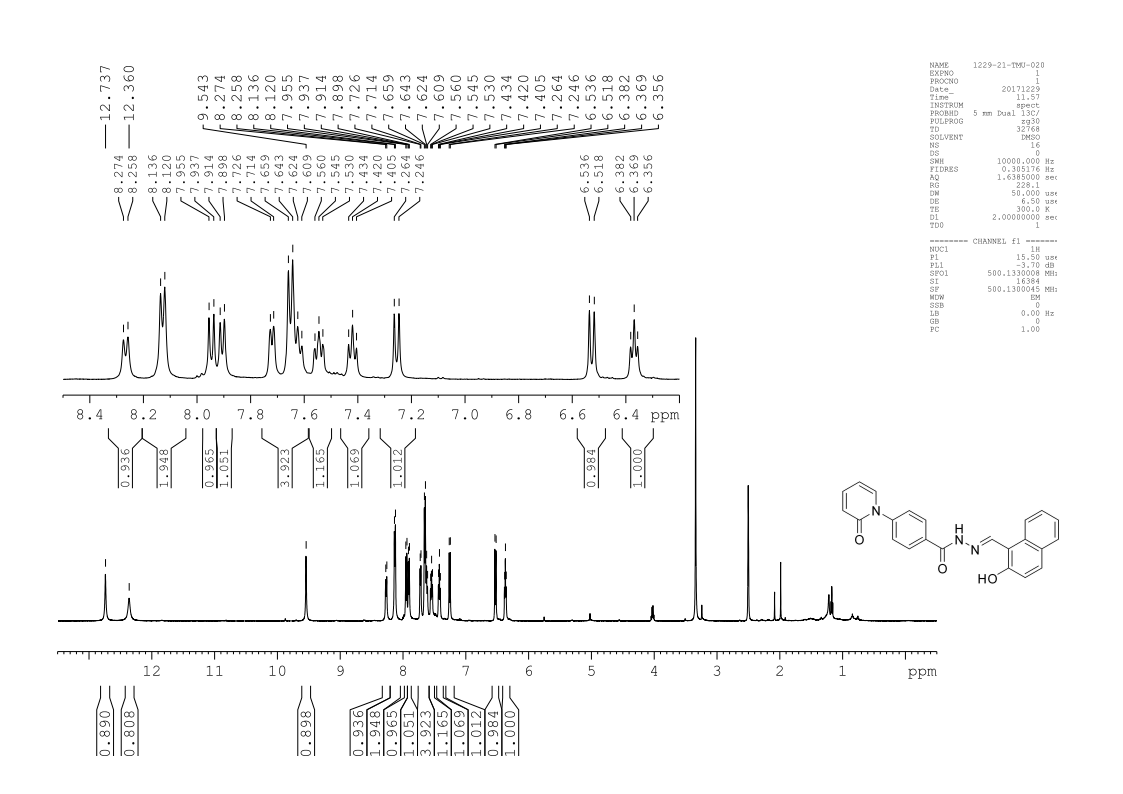


**1H Spectra for compound TP11**


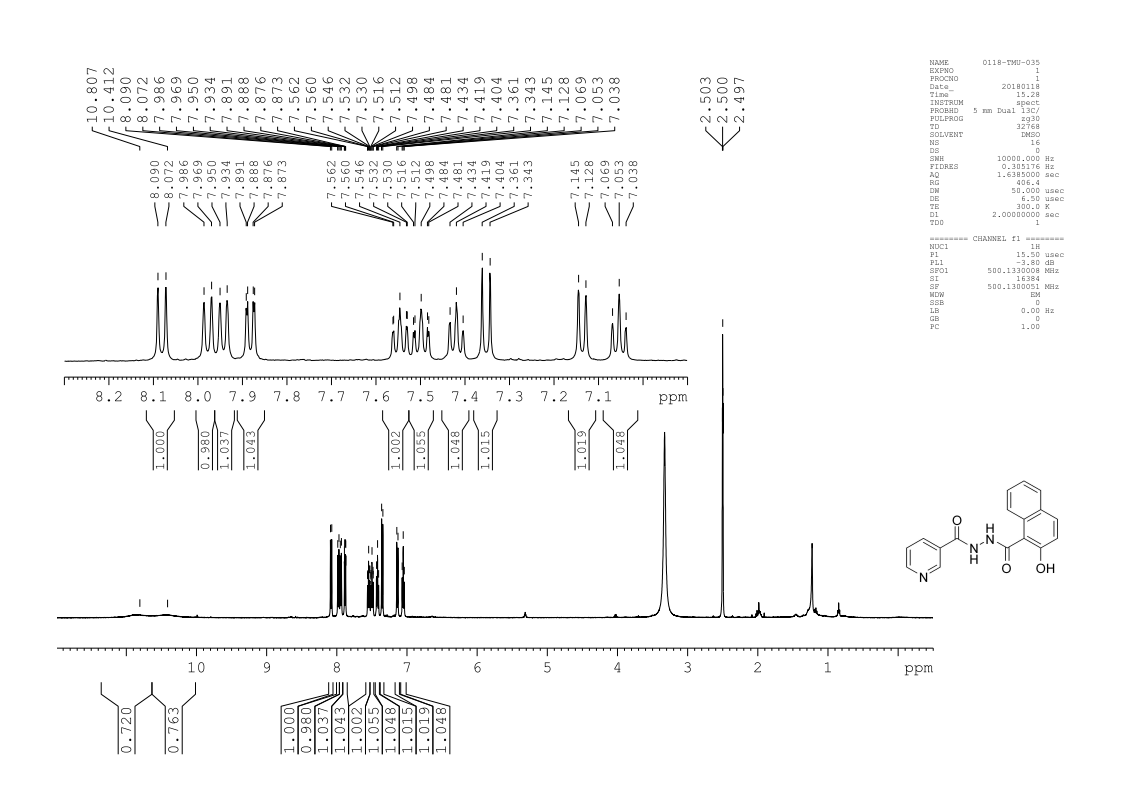


**1H Spectra for compound TP12**


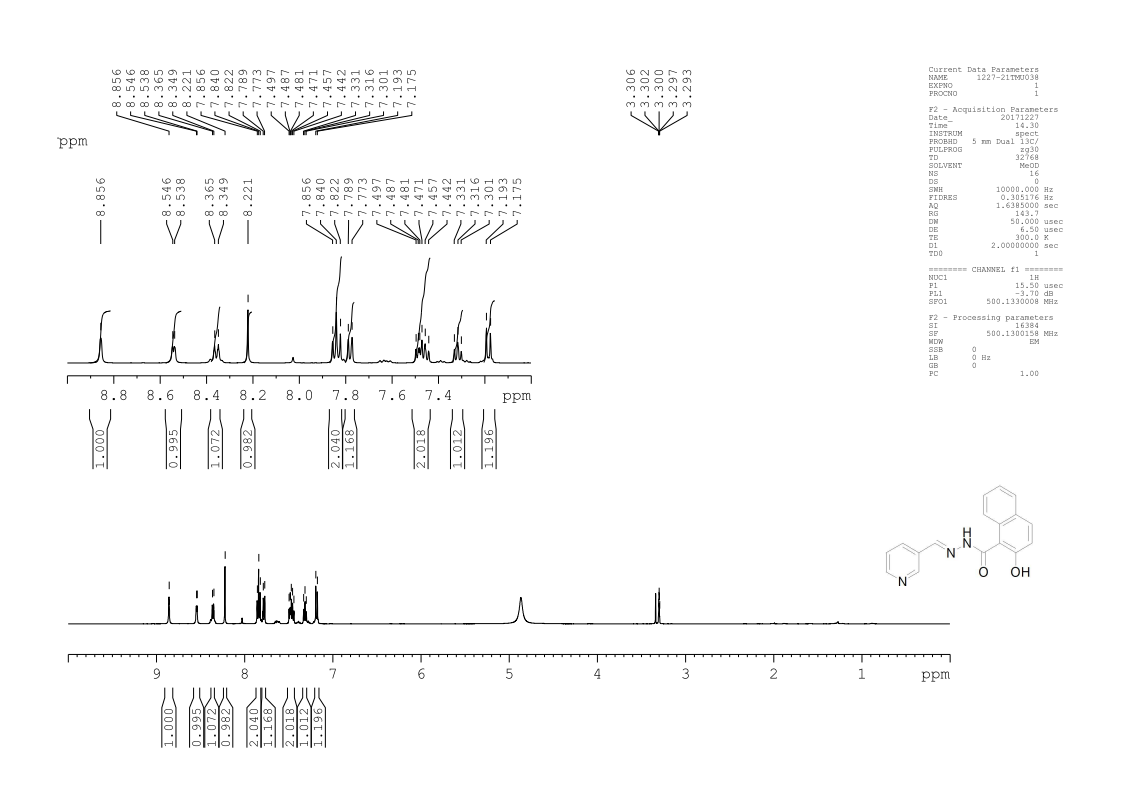


**1H Spectra for compound TP13**


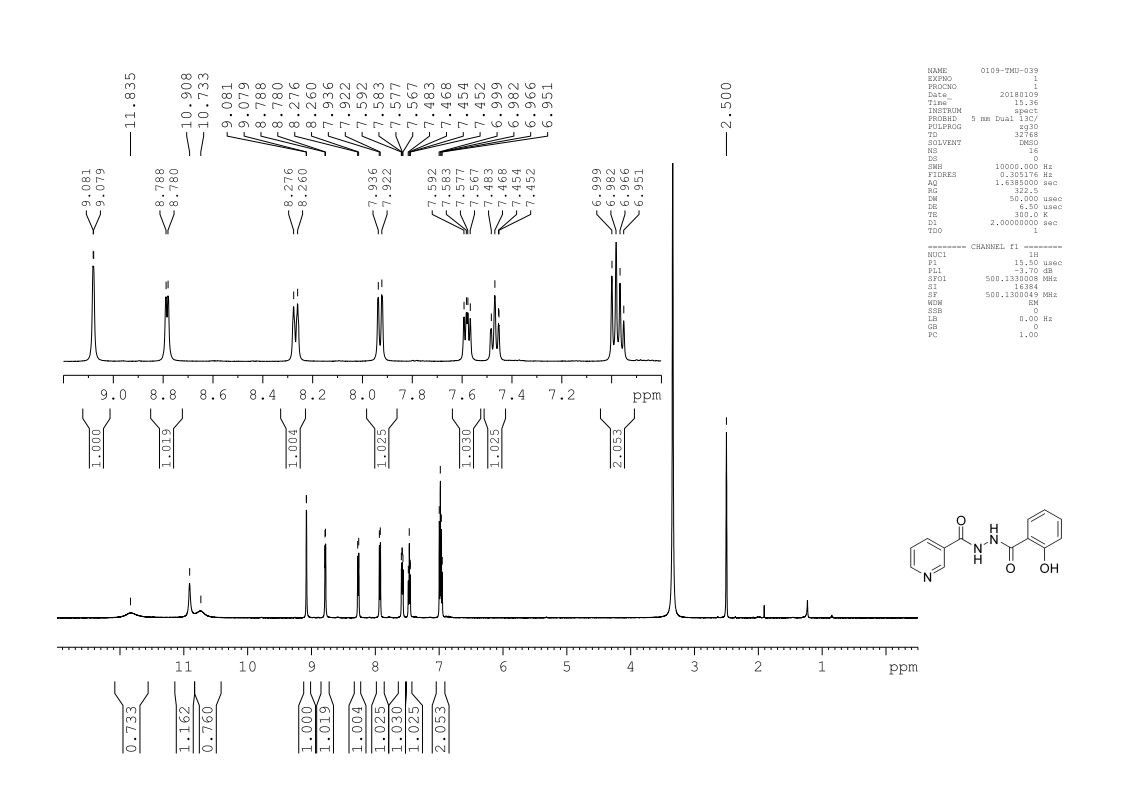


**13C Spectra for compound TP1**


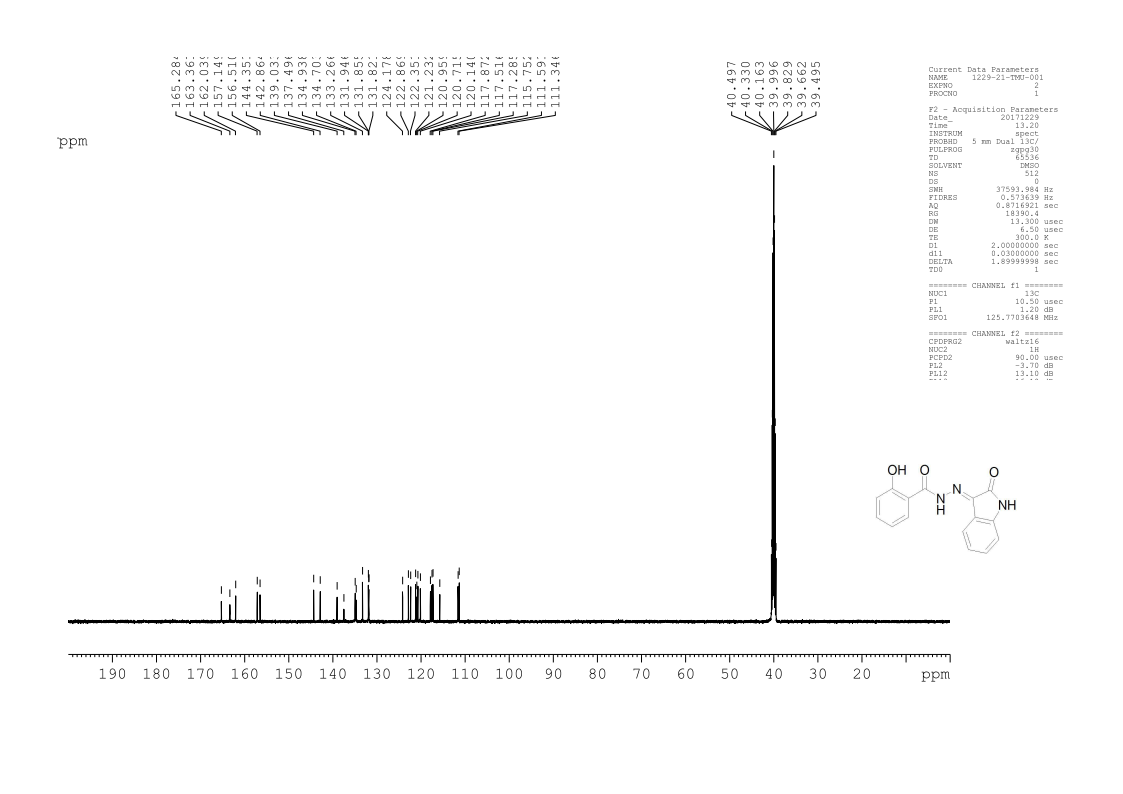


**13C Spectra for compound TP2**


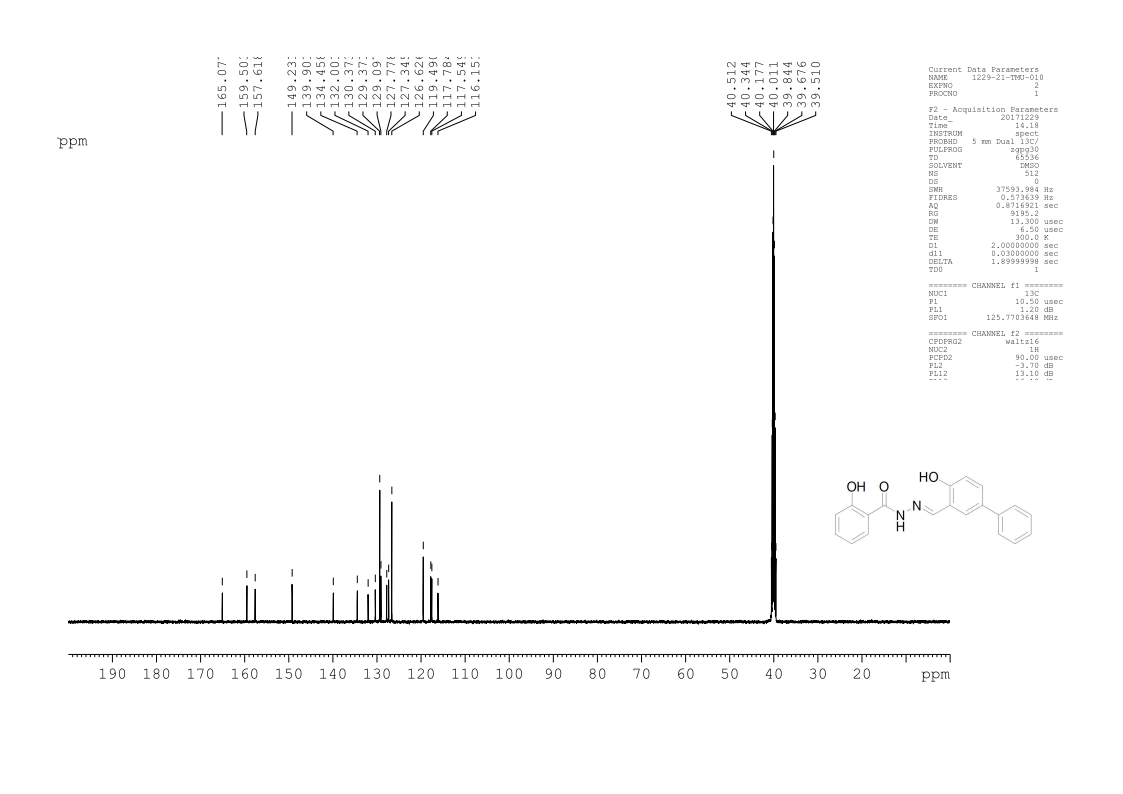


**13C Spectra for compound TP3**


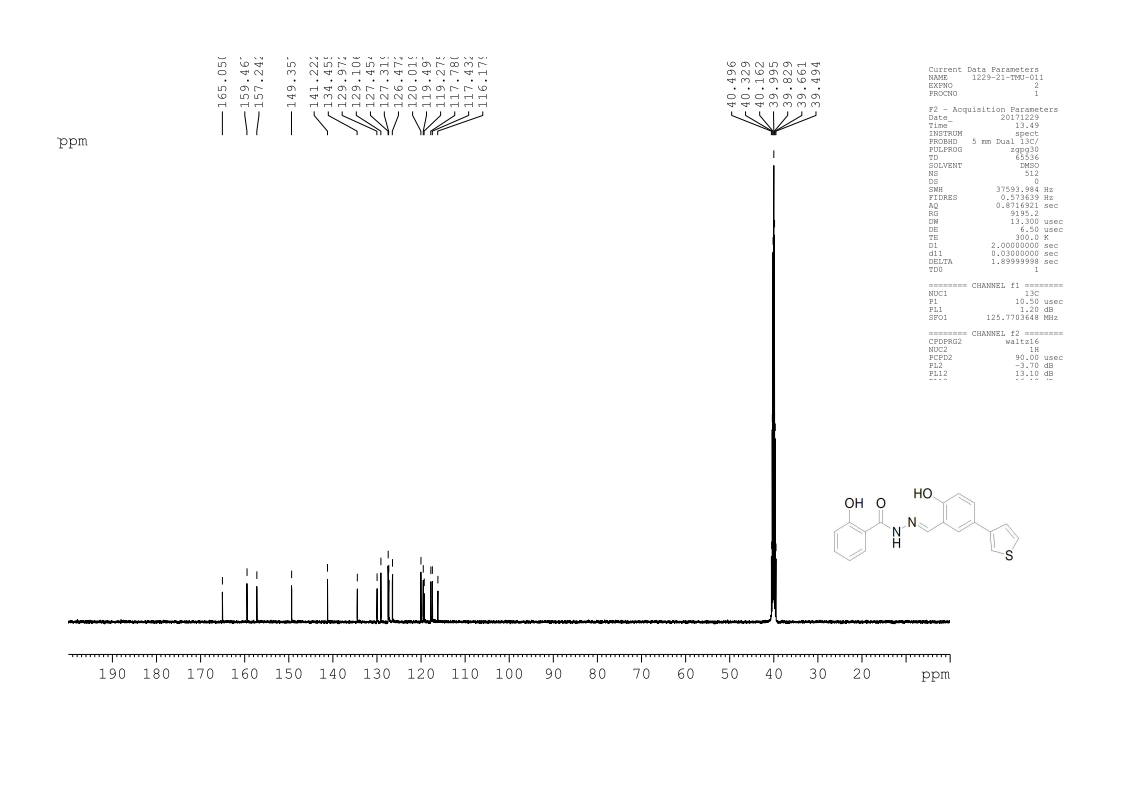


**13C Spectra for compound TP4**


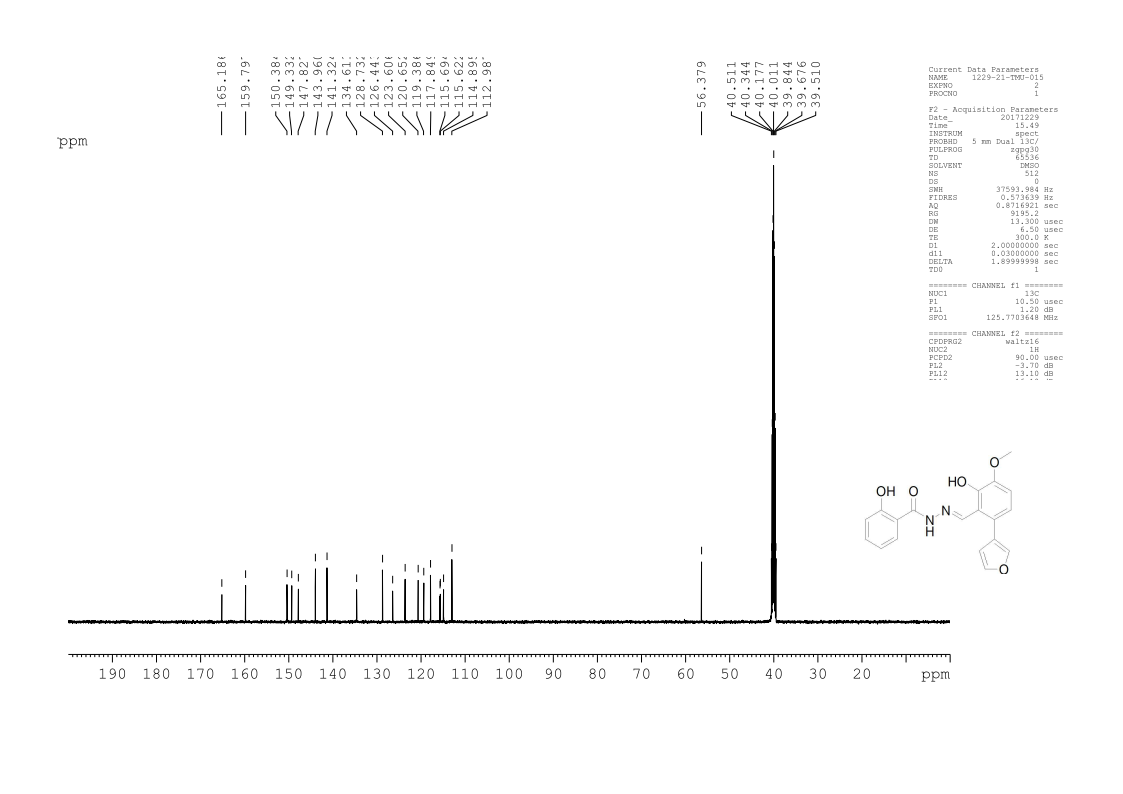


**13C Spectra for compound TP5**


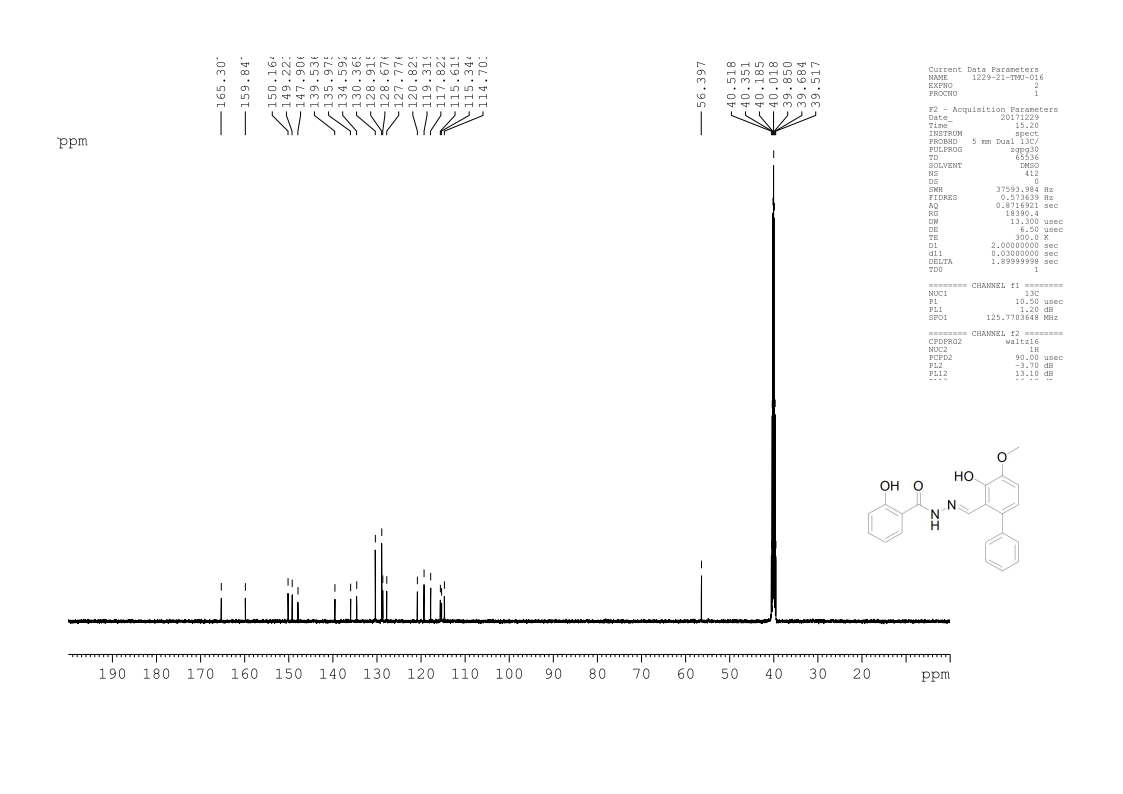


**13C Spectra for compound TP6**


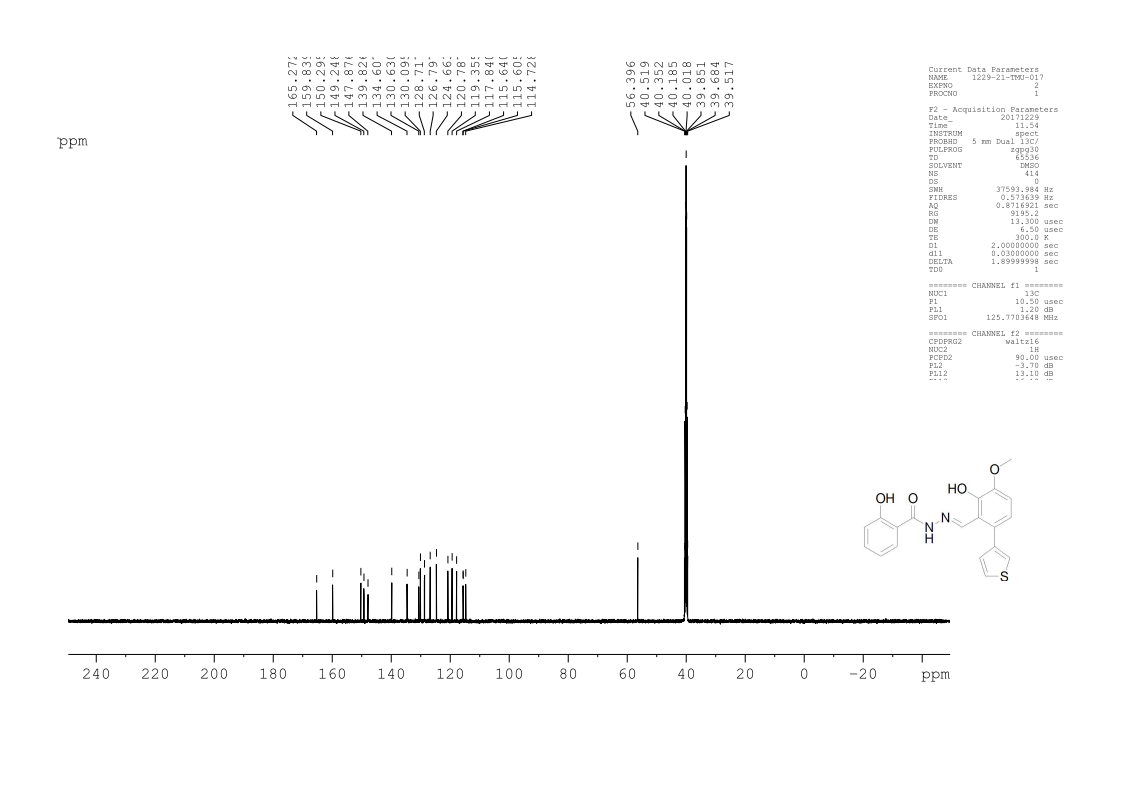


**13C Spectra for compound TP7**


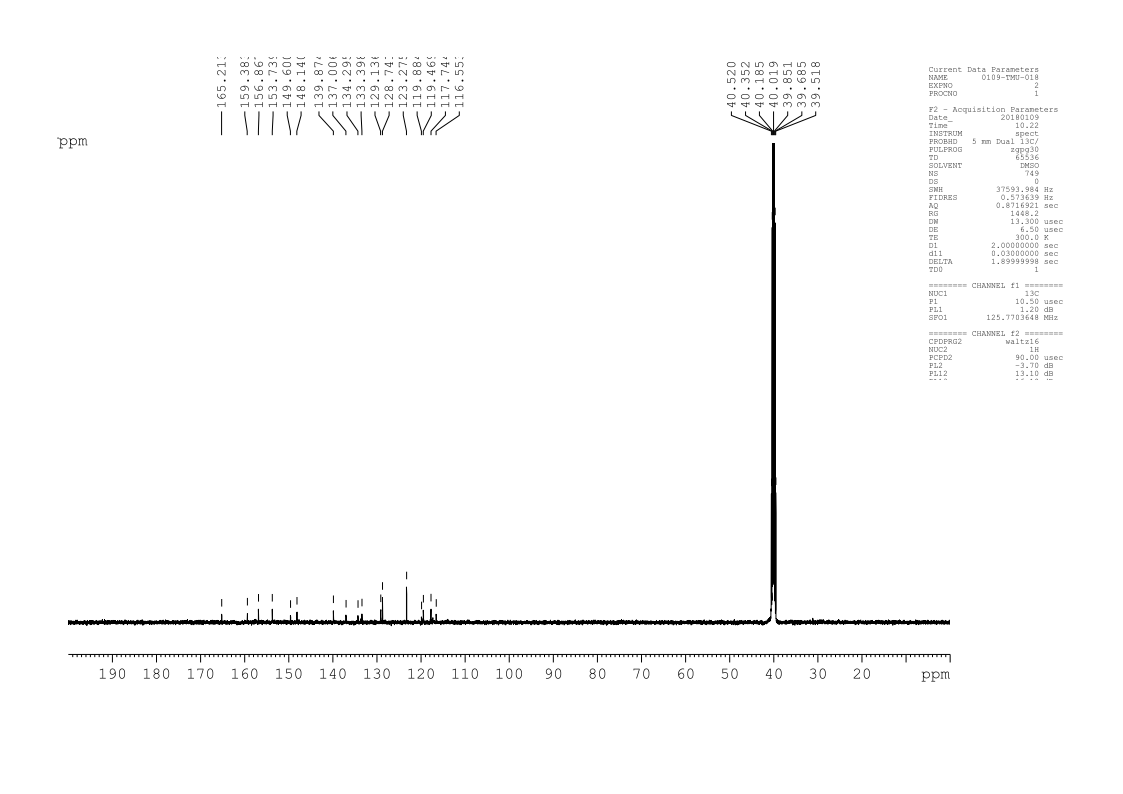


**13C Spectra for compound TP8**


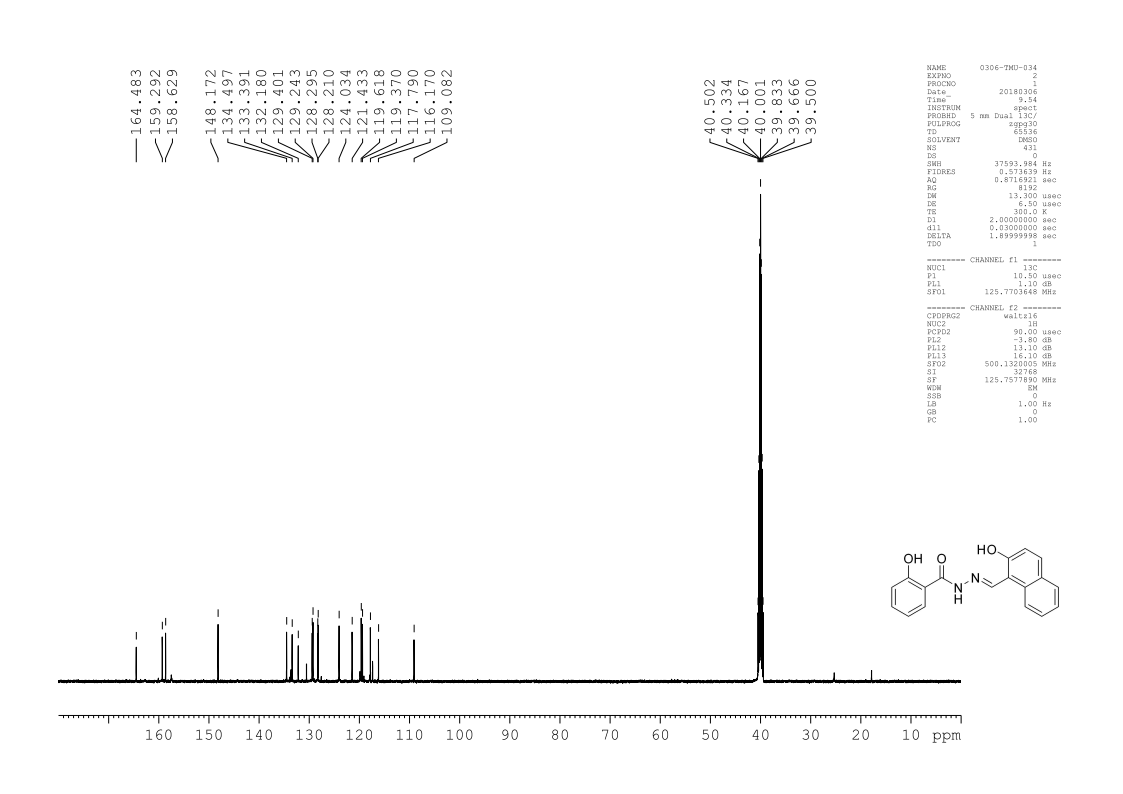


**13C Spectra for compound TP9**


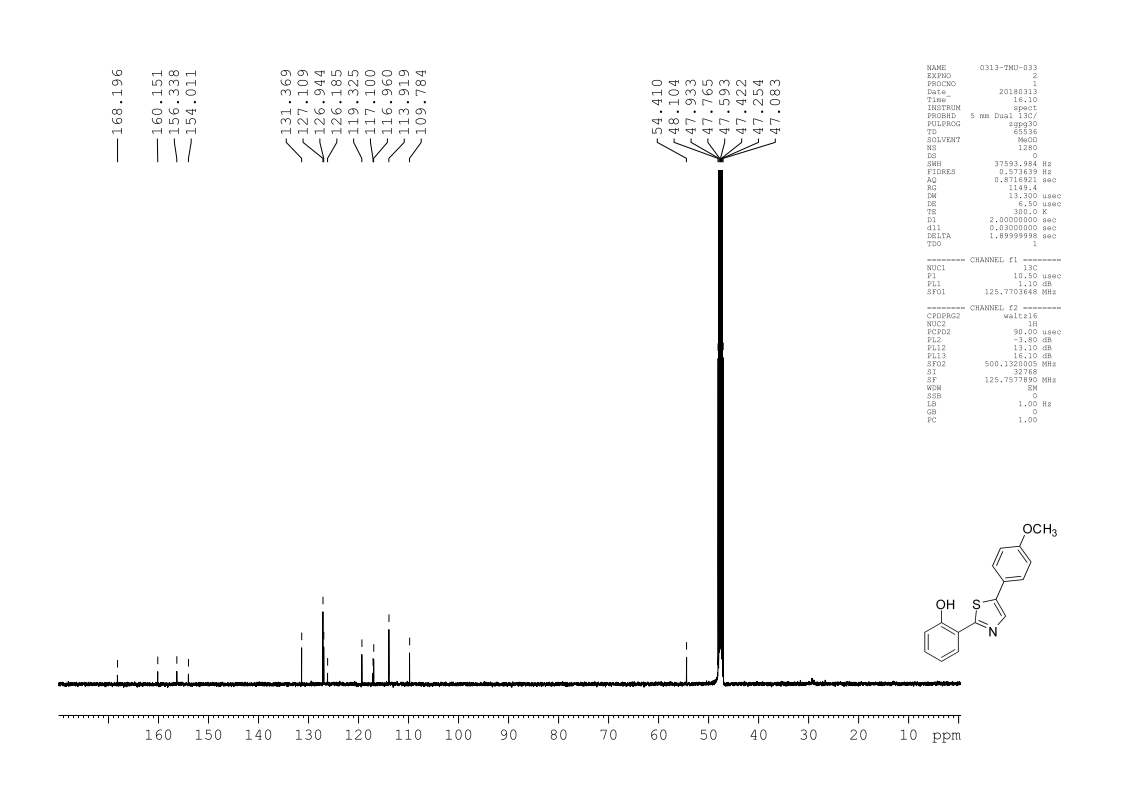


**13C Spectra for compound TP10**


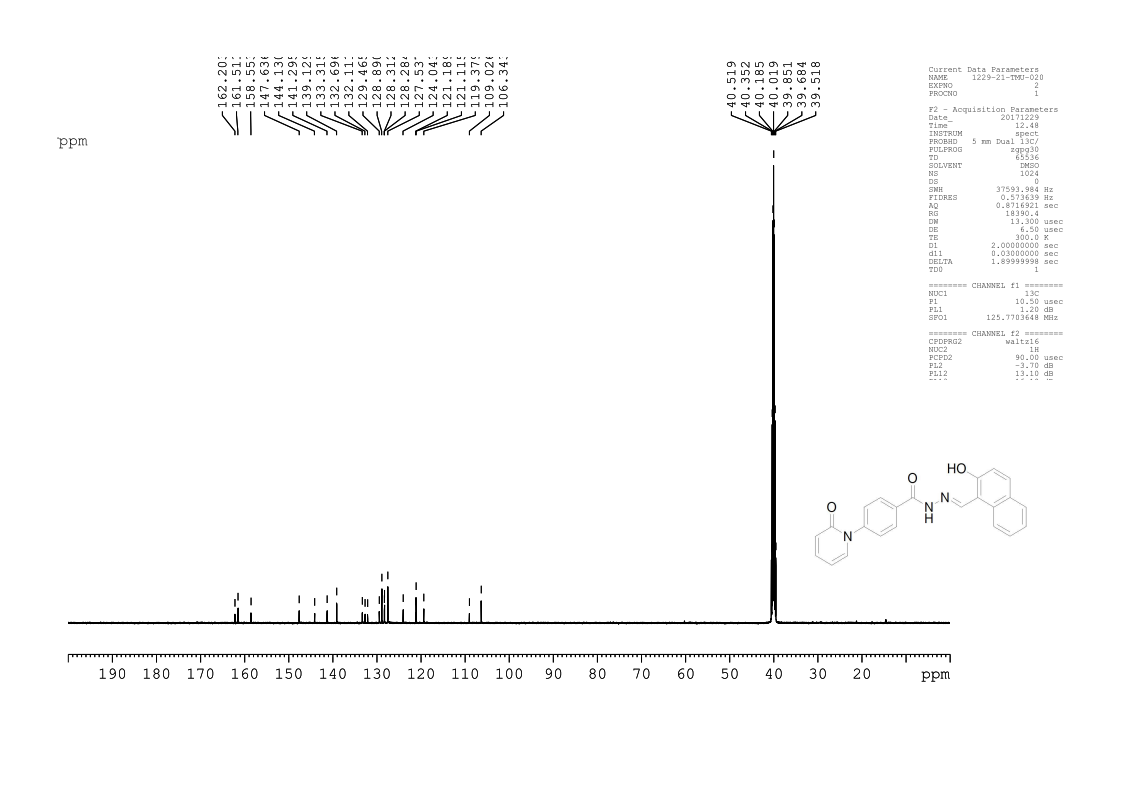


**13C Spectra for compound TP11**


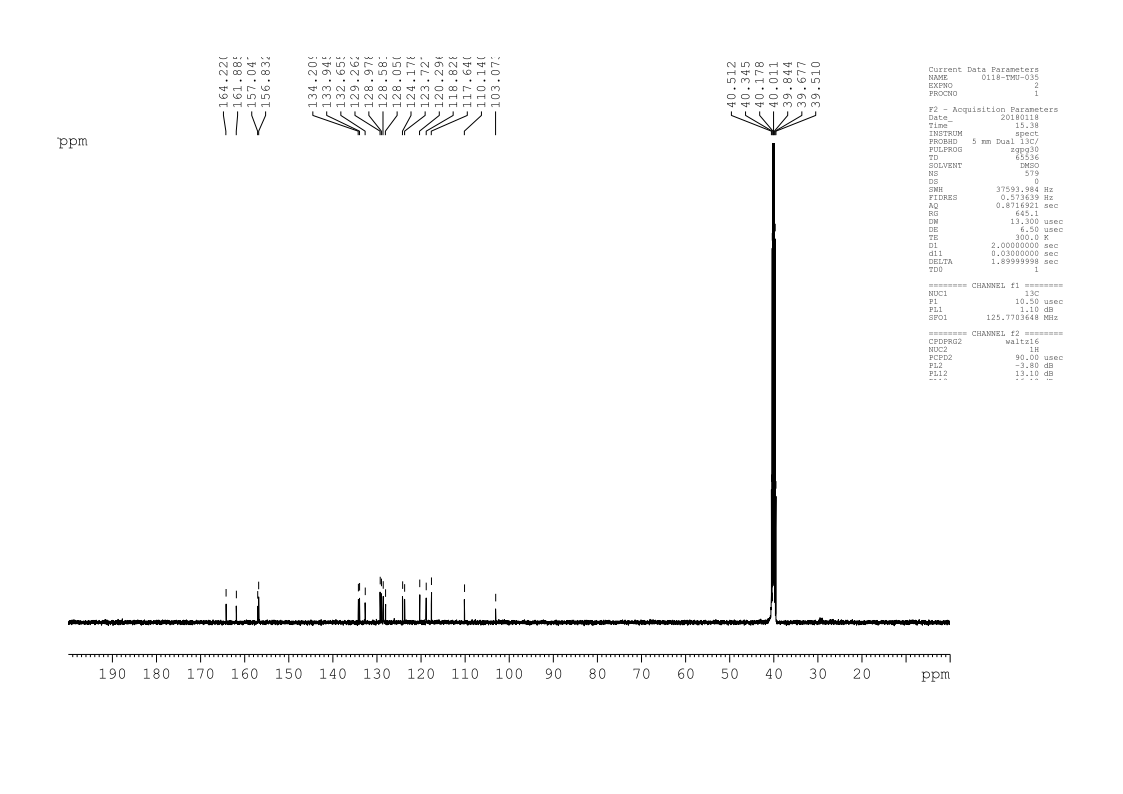


**13C Spectra for compound TP12**


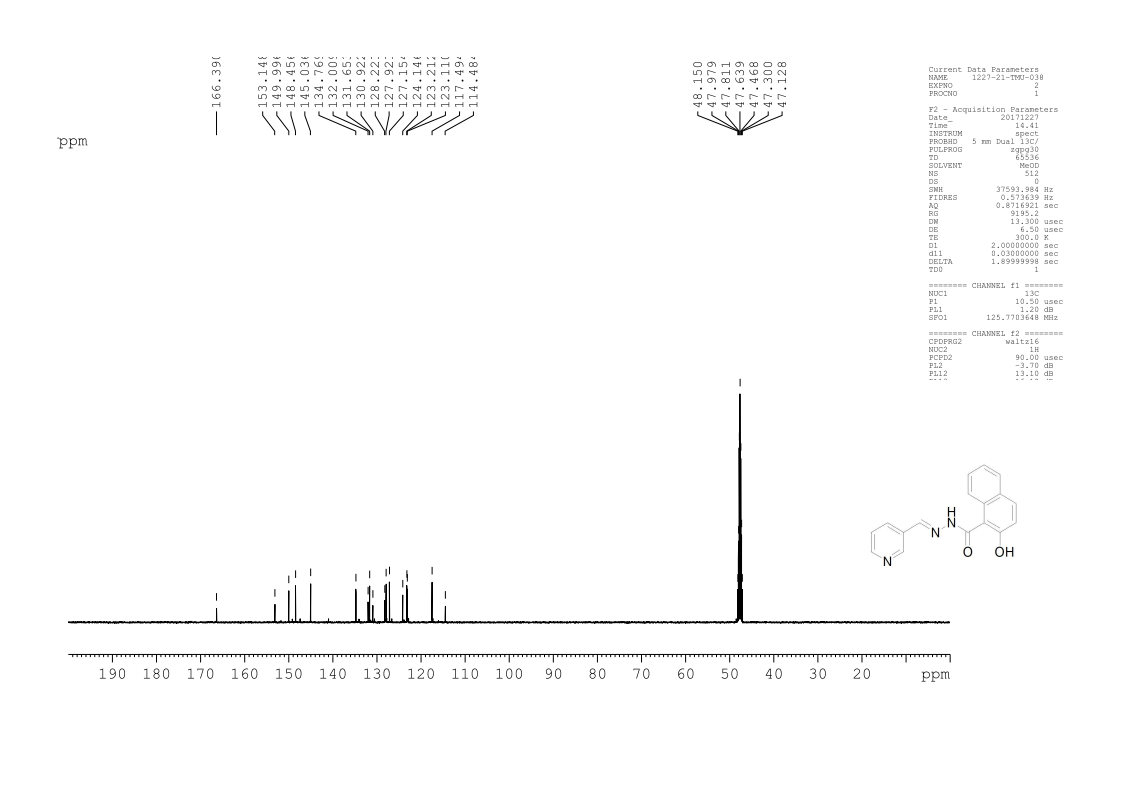


**13C Spectra for compound TP13**


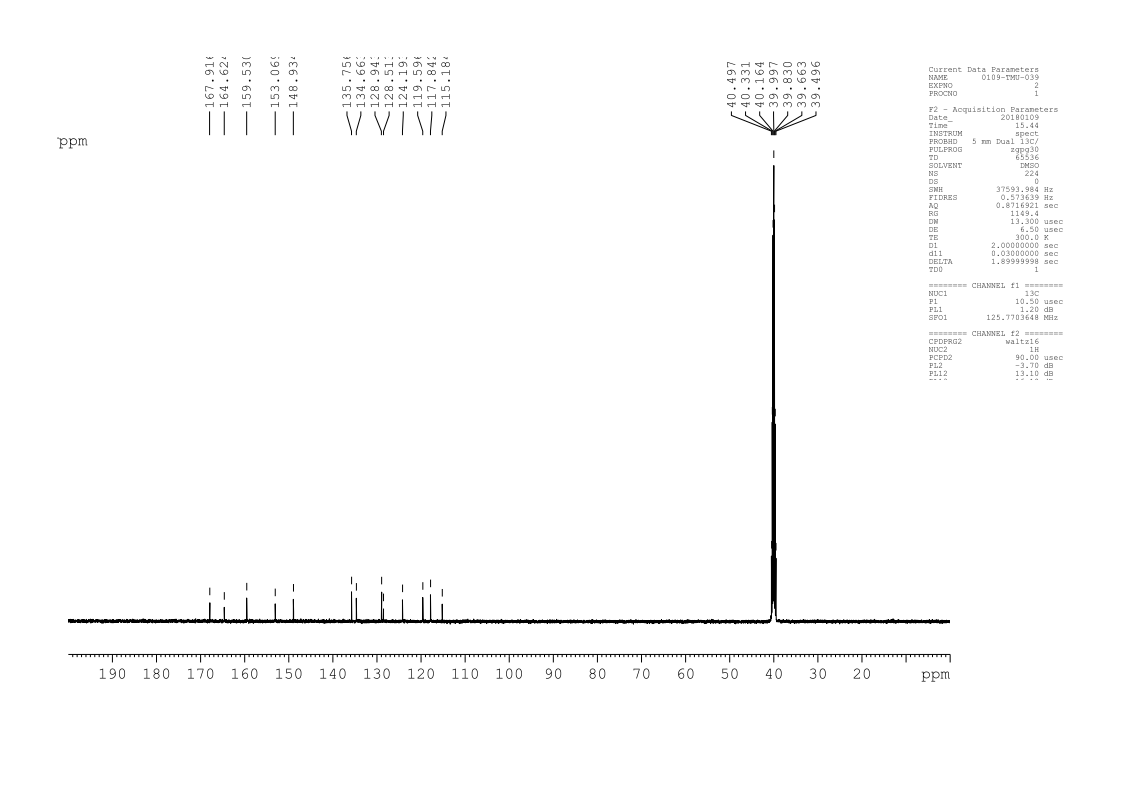


**HRMS for compound TP1**


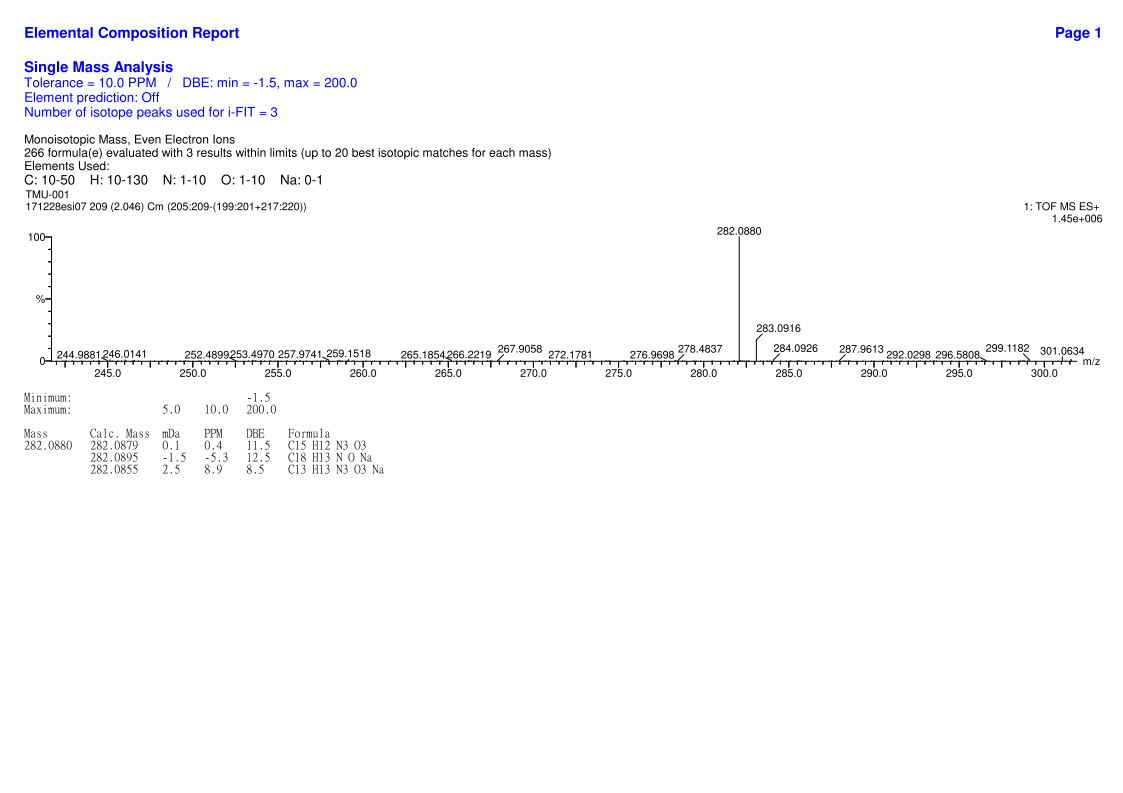


**HRMS for compound TP2**


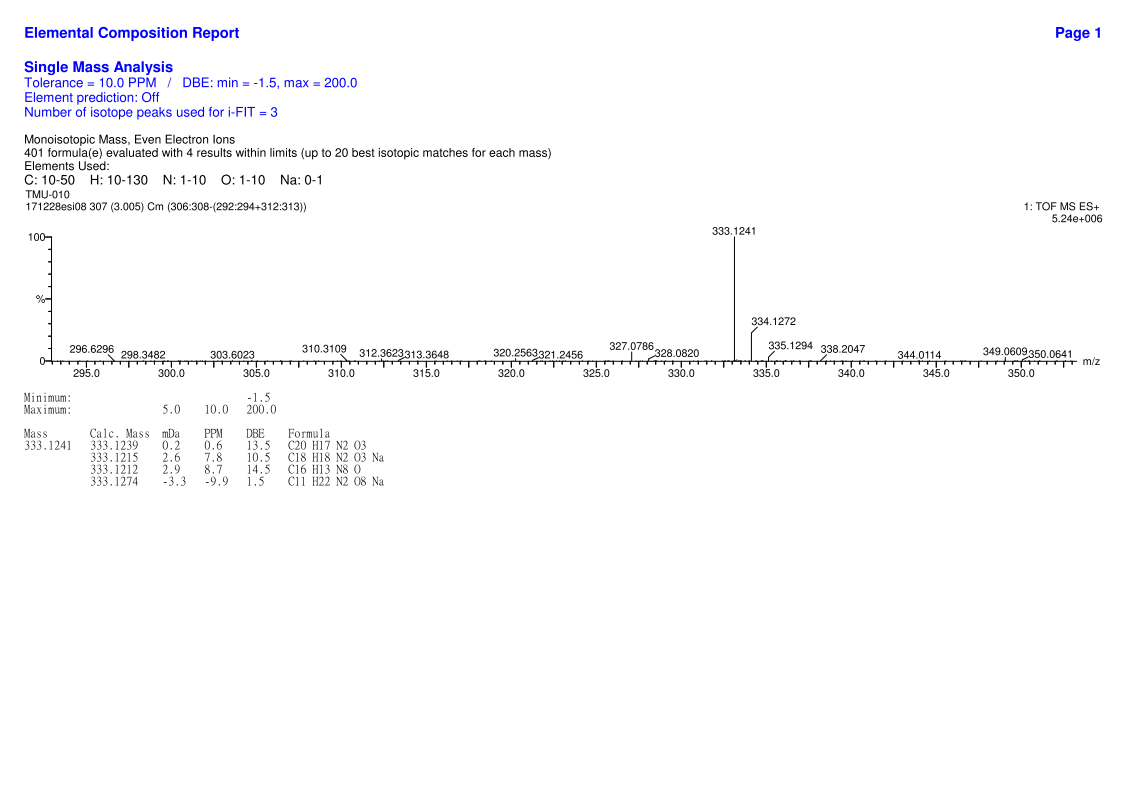
**HRMS for compound TP3**


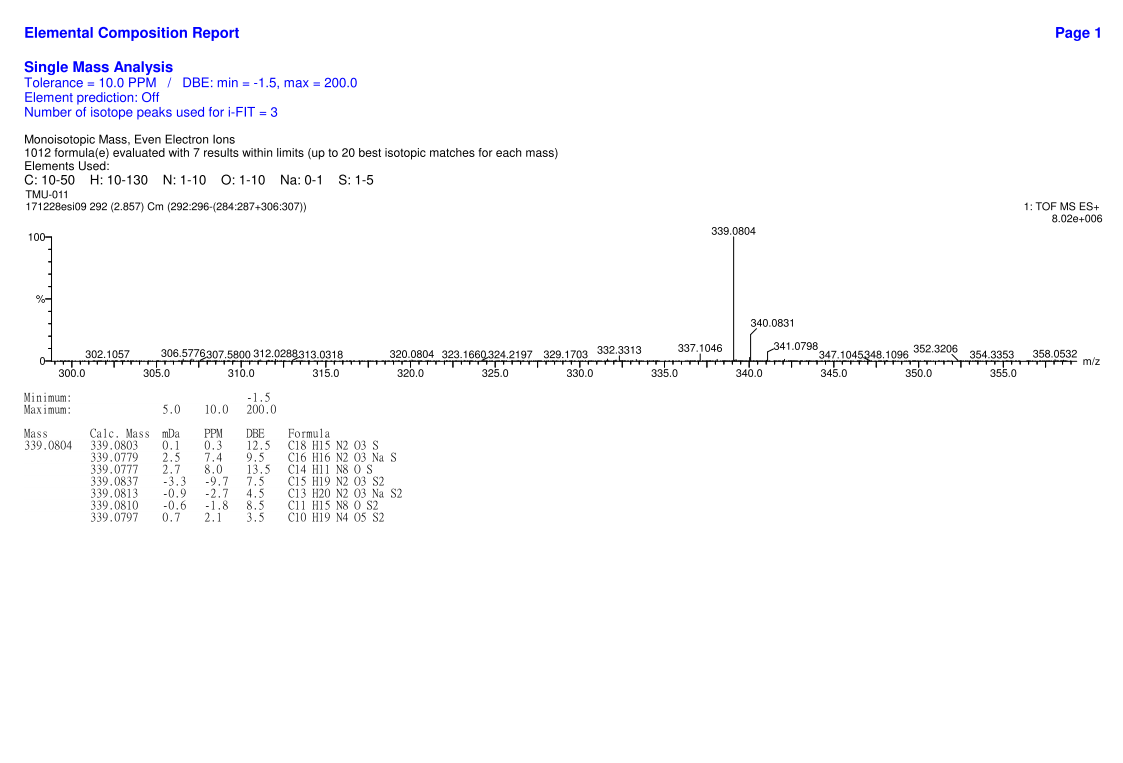
**HRMS for compound TP4**


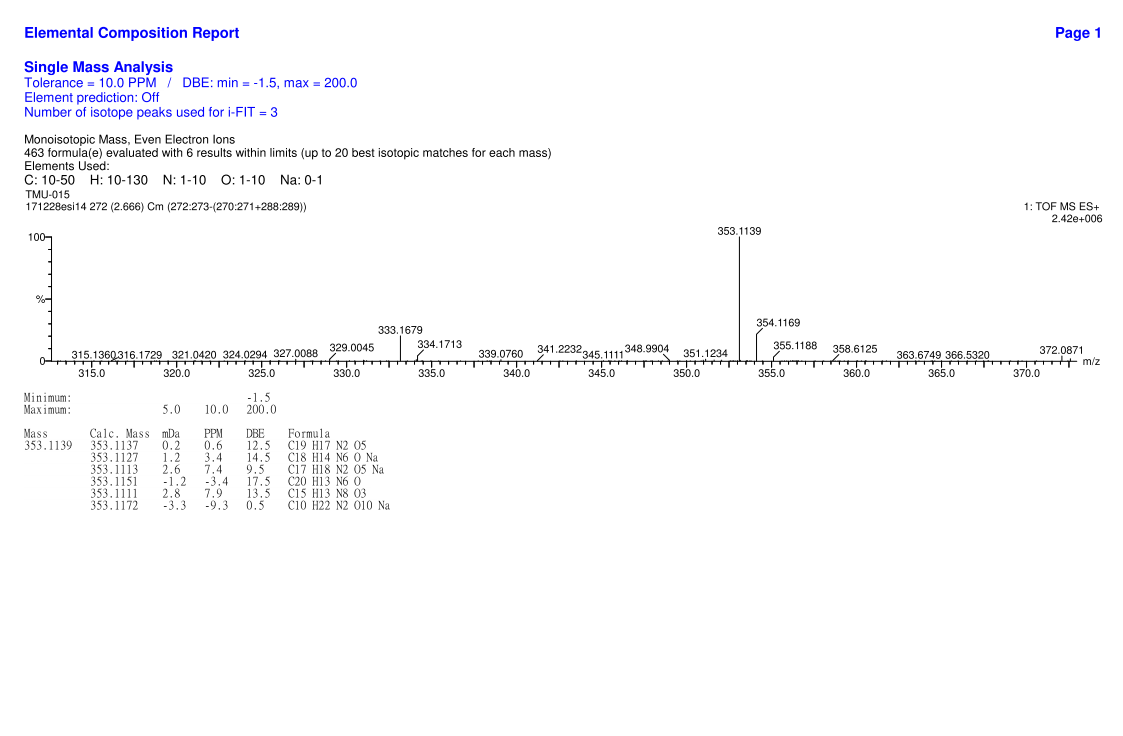
**HRMS for compound TP5**


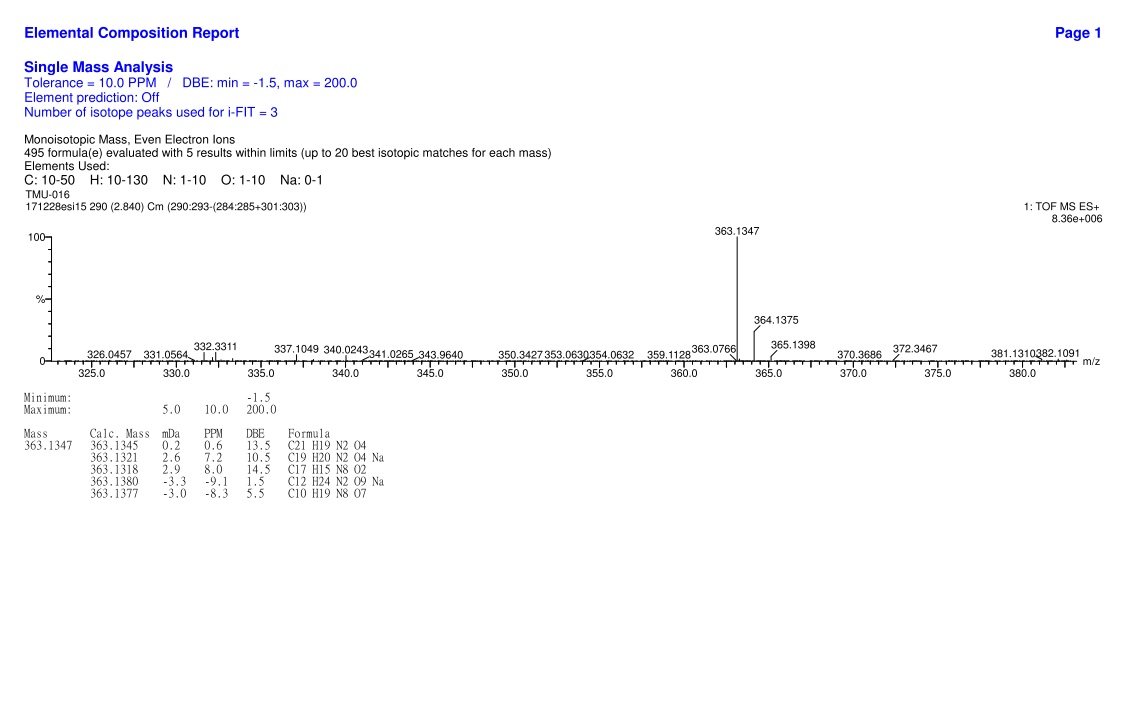
**HRMS for compound TP6**


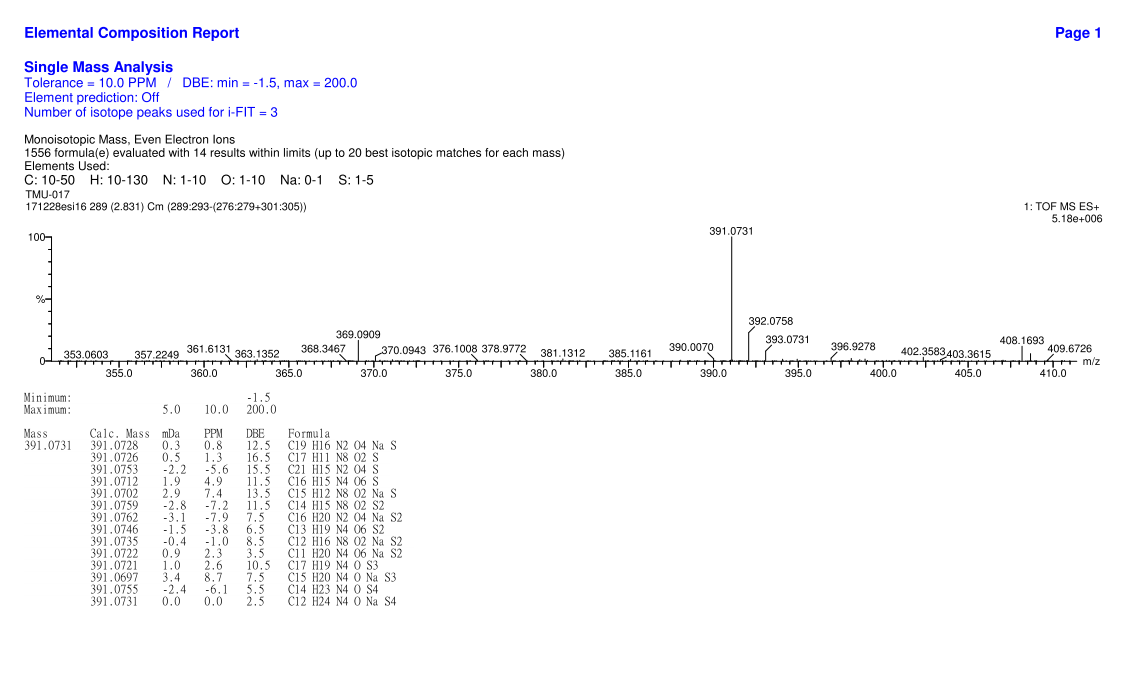
**HRMS for compound TP7**


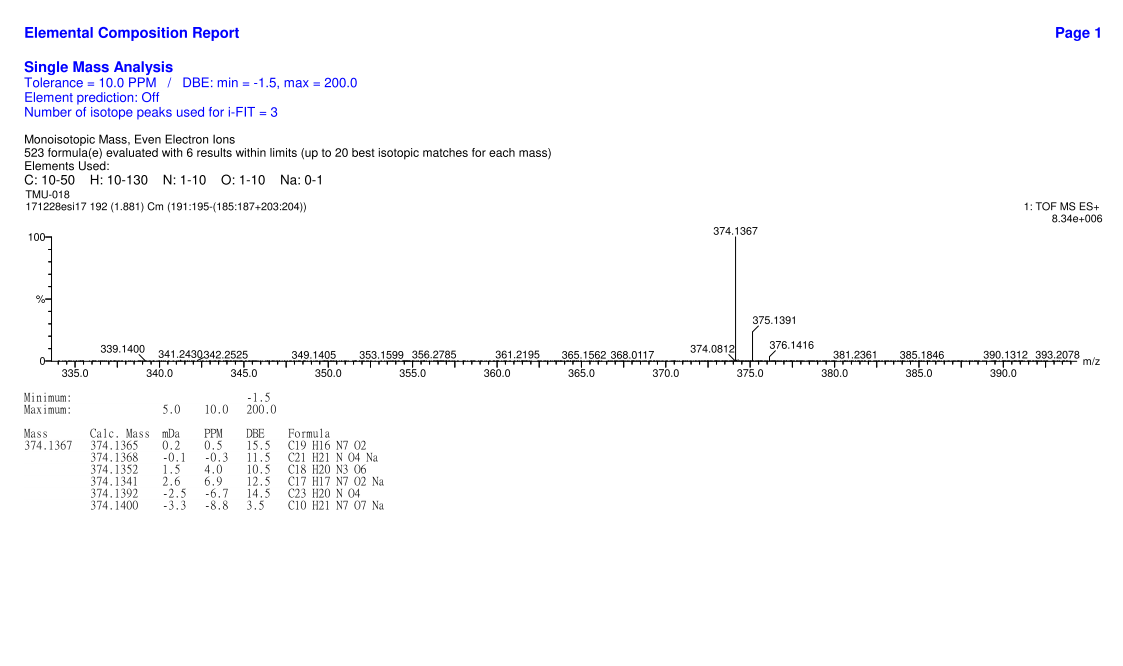
**HRMS for compound TP8**


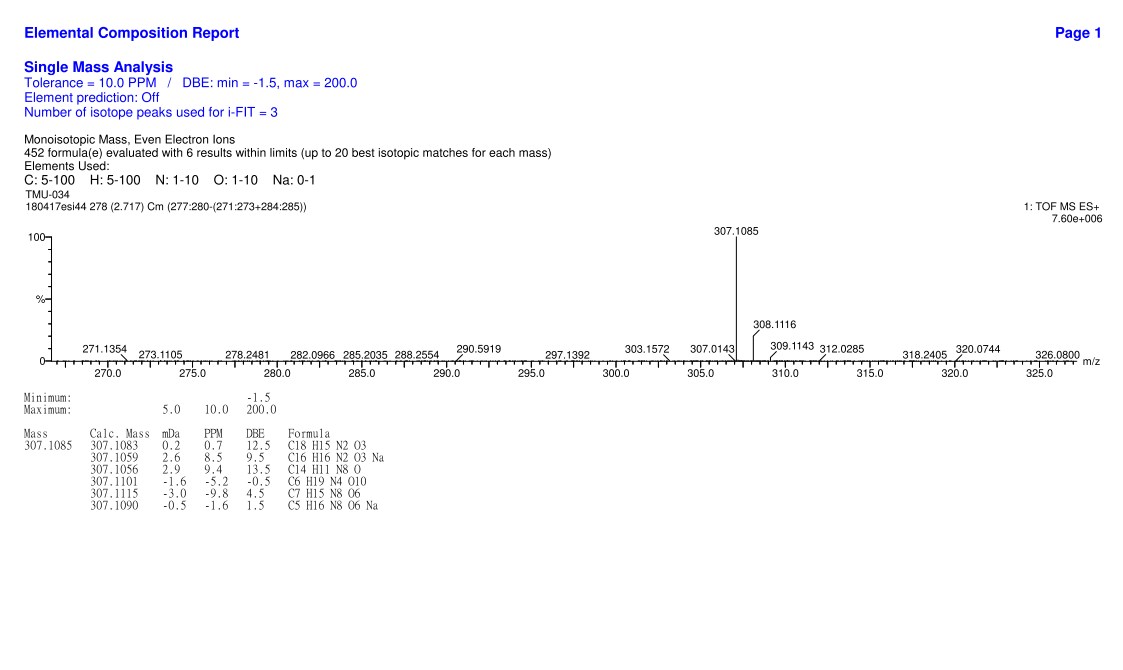
**HRMS for compound TP9**


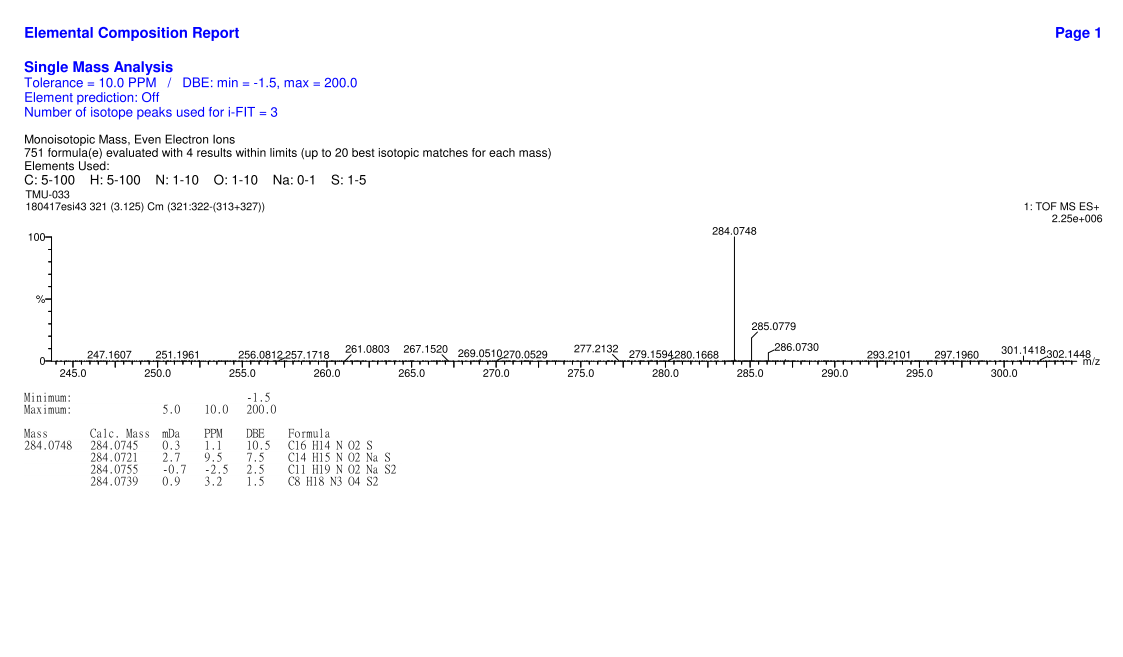
**HRMS for compound TP10**


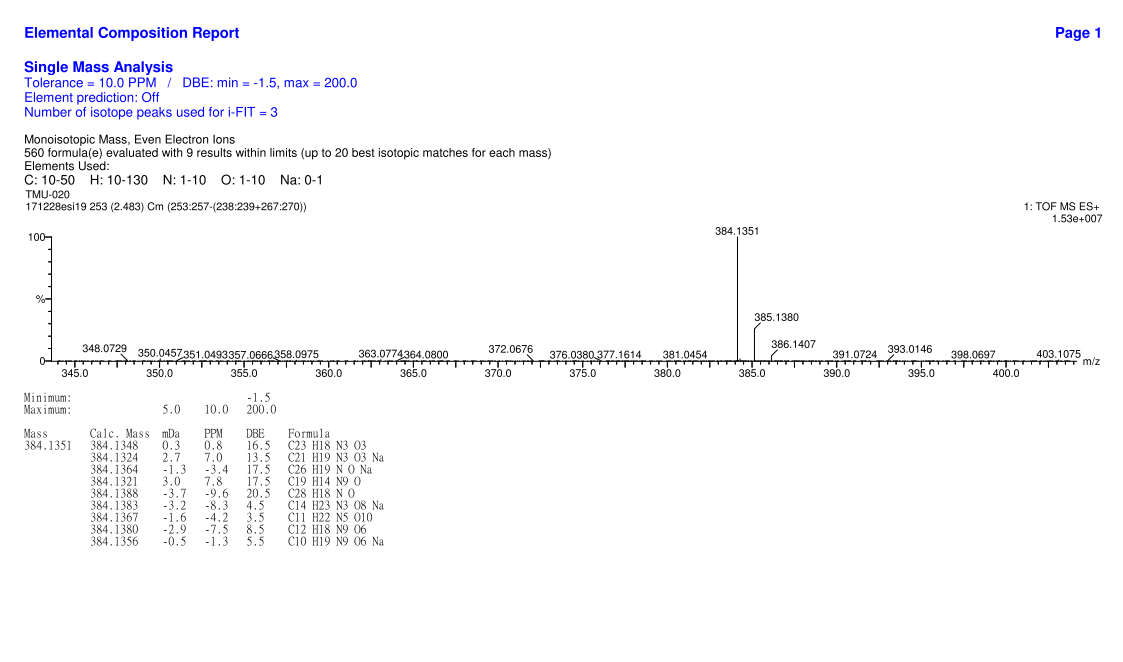
**HRMS for compound TP11**


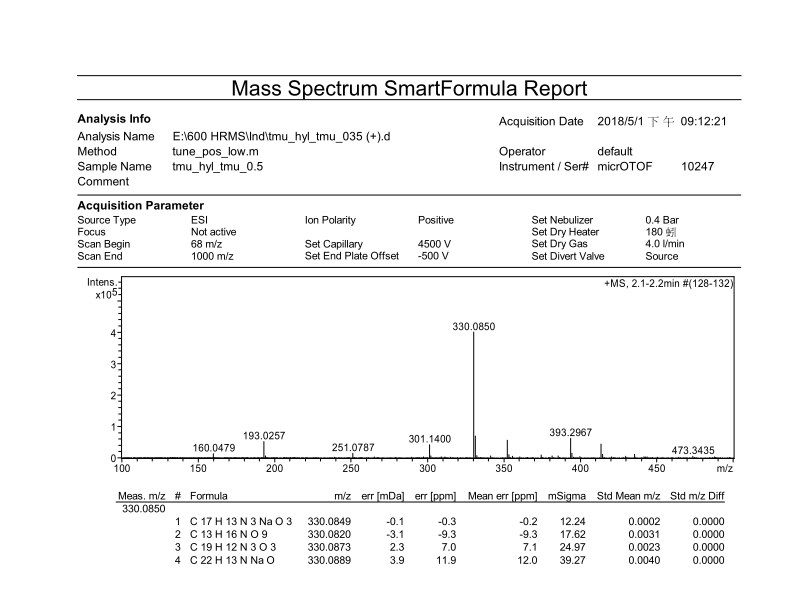
**HRMS for compound TP12**


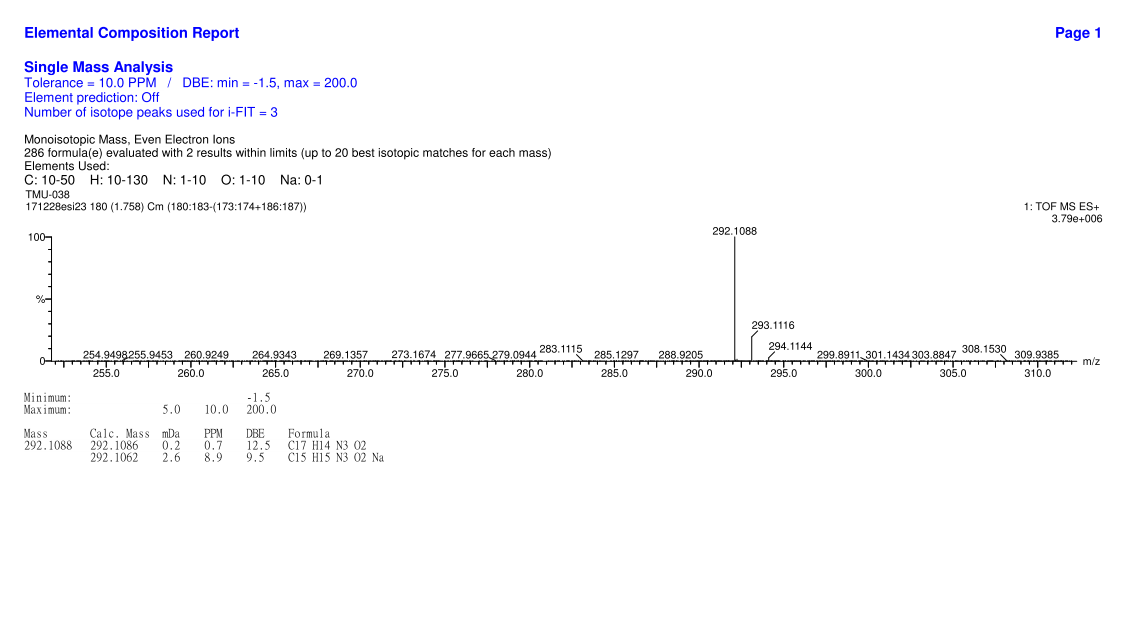
**HRMS for compound TP13**


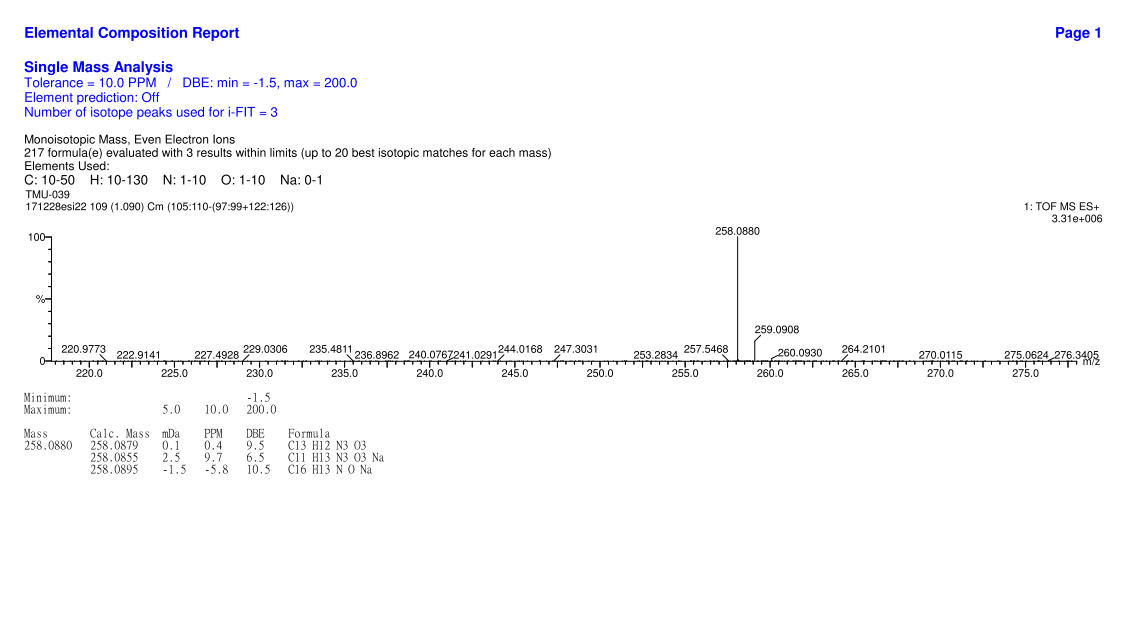

Supplement: Supplementary file 1 [file 14037887]
